# Supplementary material
Source: PubMed Central journal article supplement (PMC3318347)
Supplement: supp_56.4.1845_SuppMaterial.pdf [file supp_56.4.1845_SuppMaterial.pdf]

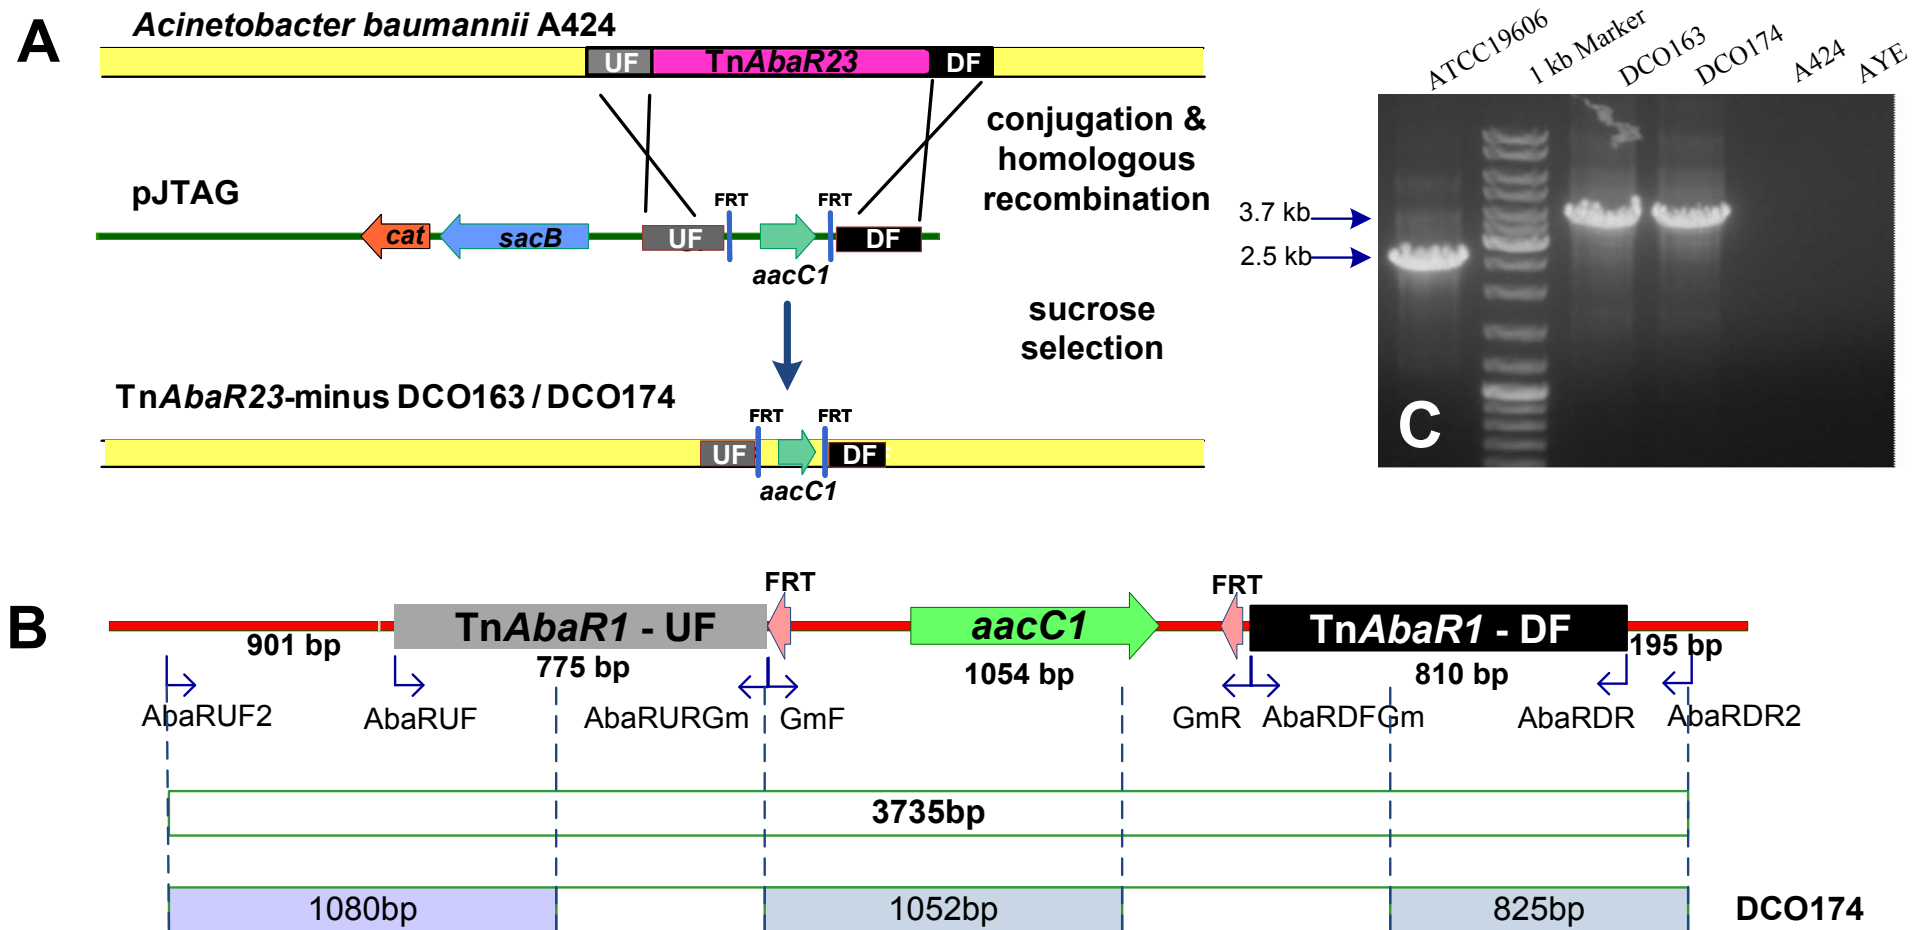

**Fig. S1: Construction and analysis of the putative TnAbaR23-minus mutants of *Acinetobacter baumannii* A424.** (A) Schematic depiction of allelic exchange method used to construct TnAbaR23-minus derivatives of A424. Mutant construction was mediated by conjugative-delivery of the pJTAG suicide plasmid into *A. baumannii* A424 from an *E. coli*  $\lambda$  *pir*-expressing donor. pJTAG was constructed by cloning an SOE-PCR fragment comprising TnAbaR1-associated upstream and downstream flanks (UF & DF) amplified from strain AYE and an intervening FRT-flanked *aacC1* antibiotic resistance marker into the *NotI* site of pJTOOL-3 (32). Initial single cross-over mutants were recovered by gentamicin selection. Subsequent screening on sucrose medium was used to identify *sacB*-minus candidate double cross-over mutants. (B) Schematic representation of PCR- and sequencing-based validation of the TnAbaR23-minus mutant DCO174. Blue angled arrows represent locations of primers, which were used for amplification of the different fragments. Blue boxes show the regions of the mutant that were confirmed by sequencing. Equivalent regions of both TnAbaR23-minus mutants generated during this study were sequenced to confirm targeted deletion of TnAbaR23. (C) PCR amplification across the targeted deleted locus in DCO163 and DCO174 using the primers AbaRUF2 and AbaRDR2 yields the expected ~3.7 kb product. Given the presence of the large intervening TnAbaR23 element, these same primers failed to produce an amplicon with wild-type A424 template DNA. The sequenced strains ATCC 19606 and AYE that lacked and harboured an island within the *comM* gene were used as positive (2.5 kb band expected) and negative PCR controls, respectively.

**A**

A424-ABAYE3778 TGCGCGATGCATTTACTCTATCAAGAGCAAAAAATTTCTCTTTTCCAAGATGATTCTGTT 60  
DCO174-ABAYE3778 TGCGCGATGCATTTACTCTATCAAGAGCAAAAAATTTCTCTTTTCCAAGATGATTCTGTT 60  
DCO163-ABAYE3778 TGCGCGATGCATTTACTCTATCAAGAGCAAAAAATTTCTCTTTTCCAAGATGATTCTGTT 60  
\*\*\*\*\*

A424-ABAYE3778 GAACCGAATGAATGGATCATTACCATCTTTGTTACGATGGAACCAGAGTATTCAGATATT 120  
DCO174-ABAYE3778 GAACCGAATGAATGGATCATTACCATCTTTGTTACGATGGAACCAGAGTATTCAGATATT 120  
DCO163-ABAYE3778 GAACCGAATGAATGGATCATTACCATCTTTGTTACGATGGAACCAGAGTATTCAGATATT 120  
\*\*\*\*\*

A424-ABAYE3778 GTTGATCTGGAGCAGTGGTTTTTCGACAATCGCTGAGCAATTTAACGGCGAATATGATGGG 180  
DCO174-ABAYE3778 GTTGATCTGGAGCAGTGGTTTTTCGACAATCGCTGAGCAATTTAACGGCGAATATGATGGG 180  
DCO163-ABAYE3778 GTTGATCTGGAGCAGTGGTTTTTCGACAATCGCTGAGCAATTTAACGGCGAATATGATGGG 180  
\*\*\*\*\*

A424-ABAYE3778 TGGGGCTGCATGGCTTATGTCTTCGACGAAGAAGAAGATGACATTTTACAATAAAGCCTA 240  
DCO174-ABAYE3778 TGGGGCTGCATGGCTTATGTCTTCGACGAAGAAGAAGATGACATTTTACAATAAAGCCTA 240  
DCO163-ABAYE3778 TGGGGCTGCATGGCTTATGTCTTCGACGAAGAAGAAGATGACATTTTACAATAAAGCCTA 240  
\*\*\*\*\*

A424-ABAYE3778 AATATAGCCGGGAGGTTCTACAATGAGCTTATCTCAAAAAGAAATGCGGTACGTTTTTTT 300  
DCO174-ABAYE3778 AATATAGCCGGGAGGTTCTACAATGAGCTTATCTCAAAAAGAAATGCGGTACGTTTTTTT 300  
DCO163-ABAYE3778 AATATAGCCGGGAGGTTCTACAATGAGCTTATCTCAAAAAGAAATGCGGTACGTTTTTTT 300  
\*\*\*\*\*

A424-ABAYE3778 AGAGCTTGCTGCTGCTGGCGAGGTCGATGAAGCCTACGGCAATTATACCGCTCCAAACTT 360  
DCO174-ABAYE3778 AGAGCTTGCTGCTGCTGGCGAGGTCGATGAAGCCTACGGCAATTATACCGCTCCAAACTT 360  
DCO163-ABAYE3778 AGAGCTTGCTGCTGCTGGCGAGGTCGATGAAGCCTACGGCAATTATACCGCTCCAAACTT 360  
\*\*\*\*\*

A424-ABAYE3778 TAAGCATCACAAATCCCTATTATGCTGGTGATAAGACTTCTTTGAAGGAAGGGATGCGTGA 420  
DCO174-ABAYE3778 TAAGCATCACAAATCCCTATTATGCTGGTGATAAGACTTCTTTGAAGGAAGGGATGCGTGA 420  
DCO163-ABAYE3778 TAAGCATCACAAATCCCTATTATGCTGGTGATAAGACTTCTTTGAAGGAAGGGATGCGTGA 420  
\*\*\*\*\*

A424-ABAYE3778 AAGTGCAATTAAAAC TCCAAACAAAGTTCTTGAAGTTCAACATGTCATTGAAGATGGCGC 480  
DCO174-ABAYE3778 AAGTGCAATTAAAAC TCCAAACAAAGTTCTTGAAGTTCAACATGTCATTGAAGATGGCGC 480  
DCO163-ABAYE3778 AAGTGCAATTAAAAC TCCAAACAAAGTTCTTGAAGTTCAACATGTCATTGAAGATGGCGC 480  
\*\*\*\*\*

A424-ABAYE3778 TTTAGTTGCAGTACATTCGAAACTGGAATGCAAATGAATAATAAGCTAACAAATTTTAGC 540  
DCO174-ABAYE3778 TTTAGTTGCAGTACATTCGAAACTGGAATGCAAATGAATAATAAGCTAACAAATTTTAGC 540  
DCO163-ABAYE3778 TTTAGTTGCAGTACATTCGAAACTGGAATGCAAATGAATAATAAGCTAACAAATTTTAGC 540  
\*\*\*\*\*

A424-ABAYE3778 TGTGGTTCATATATGCCGTTTTGAAAAATGGAAAAATGCGGAGTTTTGGGATATTGGGCA 600  
DCO174-ABAYE3778 TGTGGTTCATATATGCCGTTTTGAAAAATGGAAAAATGCGGAGTTTTGGGATATTGGGCA 600  
DCO163-ABAYE3778 TGTGGTTCATATATGCCGTTTTGAAAAATGGAAAAATGCGGAGTTTTGGGATATTGGGCA 600  
\*\*\*\*\*

A424-ABAYE3778 AATACAGCCTGATCCACT---- 618  
DCO174-ABAYE3778 AATACAGCCTGATCCACTCGTTA 623  
DCO163-ABAYE3778 AATACAGCCTGATCCACTCGT-- 621  
\*\*\*\*\*

**B**

DCO163-*file* -TGTAGTCGATCAACTTTAGATCAGCTTTTCAATCGACAAACTCAAGACCAAGACTCTAC 59  
DCO174-*file* ----AGTCGATCAACTTTAGATCAGCTTTTCAATCGACAAACTCAAGACCAAGACTCTAC 56  
A424-*file* GTGTAGTCGATCAACTTTAGATCAGCTTTTCAATCGACAAACTCAAGACCAAGACTCTAC 60  
\*\*\*\*\*

DCO163-*file* TGTTGTTTTAGCGCCGACGTATATGCGTTTGTCTTCACAAGAGCTAGAAGCAGCTTTTGA 119  
DCO174-*file* TGTTGTTTTAGCGCCGACGTATATGCGTTTGTCTTCACAAGAGCTAGAAGCAGCTTTTGA 116  
A424-*file* TGTTGTTTTAGCGCCGACGTATATGCGTTTGTCTTCACAAGAGCTAGAAGCAGCTTTTGA 120  
\*\*\*\*\*

DCO163-*file* ACAAGATAAGTGCTTTATTAAGATTATAAAAAATCAATTTAAAACGCTTAGCACCAATAA 179  
DCO174-*file* ACAAGATAAGTGCTTTATTAAGATTATAAAAAATCAATTTAAAACGCTTAGCACCAATAA 176  
A424-*file* ACAAGATAAGTGCTTTATTAAGATTATAAAAAATCAATTTAAAACGCTTAGCACCAATAA 180  
\*\*\*\*\*

DCO163-*file* GGAAGTAACTTATGGCCACGGAAGCCATTGAAAGAAAAATTTGAATATGAGTTGGTACA 239  
DCO174-*file* GGAAGTAACTTATGGCCACGGAAGCCATTGAAAGAAAAATTTGAATATGAGTTGGTACA 236  
A424-*file* GGAAGTAACTTATGGCCACGGAAGCCATTGAAAGAAAAATTTGAATATGAGTTGGTACA 240  
\*\*\*\*\*

DCO163-*file* GTTAAATCCTTCTGTTCAGCATTTAAAAGTTATGTCTTTTGCTTCTAGTAATGAGAAGCC 299  
DCO174-*file* GTTAAATCCTTCTGTTCAGCATTTAAAAGTTATGTCTTTTGCTTCTAGTAATGAGAAGCC 296  
A424-*file* GTTAAATCCTTCTGTTCAGCATTTAAAAGTTATGTCTTTTGCTTCTAGTAATGAGAAGCC 300  
\*\*\*\*\*

DCO163-*file* TCTATATTATTGGCCACTCGTTGTATTTTTGGATGATAAAGGCTGTATTCCTGGAAGGAGT 359  
DCO174-*file* TCTATATTATTGGCCACTCGTTGTATTTTTGGATGATAAAGGCTGTATTCCTGGAAGGAGT 356  
A424-*file* TCTATATTATTGGCCACTCGTTGTATTTTTGGATGATAAAGGCTGTATTCCTGGAAGGAGT 360  
\*\*\*\*\*

DCO163-*file* GAGTGGATTTAAAAGCAAATCTTATCCTTCGACTATGTTACAGCATGCATCGATTCAAGG 419  
DCO174-*file* GAGTGGATTTAAAAGCAAATCTTATCCTTCGACTATGTTACAGCATGCATCGATTCAAGG 416  
A424-*file* GAGTGGATTTAAAAGCAAATCTTATCCTTCGACTATGTTACAGCATGCATCGATTCAAGG 420  
\*\*\*\*\*

DCO163-*file* AGTTTTAAAAGTACCGCCTTCAGCACATTATATTATGATGACGCCTTTATCTTCTGCCGT 479  
DCO174-*file* AGTTTTAAAAGTACCGCCTTCAGCACATTATATTATGATGACGCCTTTATCTTCTGCCGT 476  
A424-*file* AGTTTTAAAAGTACCGCCTTCAGCACATTATATTATGATGACGCCTTTATCTTCTGCCGT 480  
\*\*\*\*\*

DCO163-*file* GGATGTTACAGAAAAAGAGTTAACAAATCAGGGACAAATT- 519  
DCO174-*file* GGATGTTACAGAAAAAGAGTTAACAAATCAGGGACAAATTC 517  
A424-*file* GGATGTTACAGAAAAAGAGTTAACAAATCAGGGACAAATT- 520  
\*\*\*\*\*

C

A424-ompA TCGGTAGATAAAATGATCAGCAGGAATATTCTTACTAATTAATAATTCTTAACTGCCAAA 60  
DCO163-ompA TCGGTAGATAAAATGATCAGCAGGAATATTCTTACTAATTAATAATTCTTAACTGCCAAA 60  
DCO174-ompA -CGGTAGATAAAATGATCAGCAGGAATATTCTTACTAATTAATAATTCTTAACTGCCAAA 59  
\*\*\*\*\*

A424-ompA GCTCGATCTTGGCTGAGTTTTAAGTTTTTGGTCGCATCACCAGAACTATCGGTATGCCCC 120  
DCO163-ompA GCTCGATCTTGGCTGAGTTTTAAGTTTTTGGTCGCATCACCAGAACTATCGGTATGCCCC 120  
DCO174-ompA GCTCGATCTTGGCTGAGTTTTAAGTTTTTGGTCGCATCACCAGAACTATCGGTATGCCCC 119  
\*\*\*\*\*

A424-ompA ACAATTTTGACTTTTTTCCCGCCCACTTTATTTAAAGCAACAGCCATTTTCATCAAGAATT 180  
DCO163-ompA ACAATTTTGACTTTTTTCCCGCCCACTTTATTTAAAGCAACAGCCATTTTCATCAAGAATT 180  
DCO174-ompA ACAATTTTGACTTTTTTCCCGCCCACTTTATTTAAAGCAACAGCCATTTTCATCAAGAATT 179  
\*\*\*\*\*

A424-ompA TTTTGCCAGCTTCAGTTAATACTGCCTACCAGATTCAAATTCATAAATTCGATTTTTT 240  
DCO163-ompA TTTTGCCAGCTTCAGTTAATACTGCCTACCAGATTCAAATTCATAAATTCGATTTTTT 240  
DCO174-ompA TTTTGCCAGCTTCAGTTAATACTGCCTACCAGATTCAAATTCATAAATTCGATTTTTT 239  
\*\*\*\*\*

A424-ompA AAAGCATCATCAATAATCTTCTGCTCAGCCTGATTTACAGAAAGCTGGGAAAATAATTGA 300  
DCO163-ompA AAAGCATCATCAATAATCTTCTGCTCAGCCTGATTTACAGAAAGCTGGGAAAATAATTGA 300  
DCO174-ompA AAAGCATCATCAATAATCTTCTGCTCAGCCTGATTTACAGAAAGCTGGGAAAATAATTGA 299  
\*\*\*\*\*

A424-ompA TATGGAGGCTGTACCAAACCTGAAAAGACTGAATGGTTGGCTGTATTTCTGTCCGATTT 360  
DCO163-ompA TATGGAGGCTGTACCAAACCTGAAAAGACTGAATGGTTGGCTGTATTTCTGTCCGATTT 360  
DCO174-ompA TATGGAGGCTGTACCAAACCTGAAAAGACTGAATGGTTGGCTGTATTTCTGTCCGATTT 359  
\*\*\*\*\*

A424-ompA AGCATTTTCCCGGTCAGTTCAAATCGAGTTCCATTAACACTTAACTTACCCTGAGAAACT 420  
DCO163-ompA AGCATTTTCCCGGTCAGTTCAAATCGAGTTCCATTAACACTTAACTTACCCTGAGAAACT 420  
DCO174-ompA AGCATTTTCCCGGTCAGTTCAAATCGAGTTCCATTAACACTTAACTTACCCTGAGAAACT 419  
\*\*\*\*\*

A424-ompA TTTTAAAGATCAGGTGTAATCACTCGTGTGACAGAGTCACTCCATCCATTTGGAGCGGCA 480  
DCO163-ompA TTTTAAAGATCAGGTGTAATCACTCGTGTGACAGAGTCACTCCATCCATTTGGAGCGGCA 480  
DCO174-ompA TTTTAAAGATCAGGTGTAATCACTCGTGTGACAGAGTCACTCCATCCATTTGGAGCGGCA 479  
\*\*\*\*\*

A424-ompA ACTGGTCGAACTTGTATTTTATCGACAACCTTGATCTGCACCATAAACAGACTGCATTTTC 540  
DCO163-ompA ACTGGTCGAACTTGTATTTTATCGACAACCTTGATCTGCACCATAAACAGACTGCATTTTC 540  
DCO174-ompA ACTGGTCGAACTTGTATTTTATCGACAACCTTGATCTGCACCATAAACAGACTGCATTTTC 539  
\*\*\*\*\*

A424-ompA ATTAAAATAGCCTGTTTACTTGCTTCATTTGGCACTACACCTTCTACAACATATAGGCTGT 600  
DCO163-ompA ATTAAAATAGCCTGTTTACTTGCTTCATTTGGCACTACACCTTCTACAACATATAGGCTGT 600  
DCO174-ompA ATTAAAATAGCCTGTTTACTTGCTTCATTTGGCACTACACCTTCTACAACATATAGGCTGT 599  
\*\*\*\*\*

A424-ompA GCTAAAGCATAAATTCGC--- 617  
DCO163-ompA GCTAAAGCATAAATTCGC--- 617  
DCO174-ompA GCTAAAGCATAAATTCGCAAT 619  
\*\*\*\*\*

D

DCO163-11dD TGTGTTACGTGACCGTGGTTTTATGCGTAATGCTTTGGAACGTGCAAAAGCAGCAGGTTG 60  
DCO174-11dD TGTGTTACGTGACCGTGGTTTTATGCGTAATGCTTTGGAACGTGCAAAAGCAGCAGGTTG 60  
A424-11dD TGTGTTACGTGACCGTGGTTTTATGCGTAATGCTTTGGAACGTGCAAAAGCAGCAGGTTG 60  
\*\*\*\*\*

DCO163-11dD TTCAACACTGGTATTTACCGTAGATATGCCTGTACCAGGTGCACGTTATCGTGATGCCCA 120  
DCO174-11dD TTCAACACTGGTATTTACCGTAGATATGCCTGTACCAGGTGCACGTTATCGTGATGCCCA 120  
A424-11dD TTCAACACTGGTATTTACCGTAGATATGCCTGTACCAGGTGCACGTTATCGTGATGCCCA 120  
\*\*\*\*\*

DCO163-11dD TTCGGGTATGAGTGGGCCAAATGCTGCGATGCGTCGTTATATGCAGTCAGTGTTTCATCC 180  
DCO174-11dD TTCGGGTATGAGTGGGCCAAATGCTGCGATGCGTCGTTATATGCAGTCAGTGTTTCATCC 180  
A424-11dD TTCGGGTATGAGTGGGCCAAATGCTGCGATGCGTCGTTATATGCAGTCAGTGTTTCATCC 180  
\*\*\*\*\*

DCO163-11dD GCATTGGTCATGGAATGTCGGTTTTAATGGGGCGTCCGCACGACTTGGGAAATATCTCTAA 240  
DCO174-11dD GCATTGGTCATGGAATGTCGGTTTTAATGGGGCGTCCGCACGACTTGGGAAATATCTCTAA 240  
A424-11dD GCATTGGTCATGGAATGTCGGTTTTAATGGGGCGTCCGCACGACTTGGGAAATATCTCTAA 240  
\*\*\*\*\*

DCO163-11dD ATATTTAGGTAAGCCGACTGGGCTTGAAGATTATATTGGTTGGTTAGGCTCGAACTTTGA 300  
DCO174-11dD ATATTTAGGTAAGCCGACTGGGCTTGAAGATTATATTGGTTGGTTAGGCTCGAACTTTGA 300  
A424-11dD ATATTTAGGTAAGCCGACTGGGCTTGAAGATTATATTGGTTGGTTAGGCTCGAACTTTGA 300  
\*\*\*\*\*

DCO163-11dD CCCATCCATTTTCATGGAAAGACCTTGAGTGGATACGTGAGTTTTGGGATGGCCCAATGGT 360  
DCO174-11dD CCCATCCATTTTCATGGAAAGACCTTGAGTGGATACGTGAGTTTTGGGATGGCCCAATGGT 360  
A424-11dD CCCATCCATTTTCATGGAAAGACCTTGAGTGGATACGTGAGTTTTGGGATGGCCCAATGGT 360  
\*\*\*\*\*

DCO163-11dD GATTAAGGGCATTTTAGATCCTGAAGATGCCAAAGATGCTGTGCGTTTTGGTGCTGACGG 420  
DCO174-11dD GATTAAGGGCATTTTAGATCCTGAAGATGCCAAAGATGCTGTGCGTTTTGGTGCTGACGG 420  
A424-11dD GATTAAGGGCATTTTAGATCCTGAAGATGCCAAAGATGCTGTGCGTTTTGGTGCTGACGG 420  
\*\*\*\*\*

DCO163-11dD GATTGTGGTATCAAATCATGGCGGTCGTGAGTTAGATGGCGTGATGTCATCTGCTCGTGC 480  
DCO174-11dD GATTGTGGTATCAAATCATGGCGGTCGTGAGTTAGATGGCGTGATGTCATCTGCTCGTGC 480  
A424-11dD GATTGTGGTATCAAATCATGGCGGTCGTGAGTTAGATGGCGTGATGTCATCTGCTCGTGC 480  
\*\*\*\*\*

DCO163-11dD ATTGCCTGCAATTGCCGATGCGGTGAAAGGTGACTTAGCGATTTTGGCTGACTCAGGCAT 540  
DCO174-11dD ATTGCCTGCAATTGCCGATGCGGTGAAAGGTGACTTAGCGATTTTGGCTGACTCAGGCAT 540  
A424-11dD ATTGCCTGCAATTGCCGATGCGGTGAAAGGTGACTTAGCGATTTTGGCTGACTCAGGCAT 540  
\*\*\*\*\*

DCO163-11dD TCGTAATGGTTTTAGATGTGGTGCGTATGTTGGCGCTCGGTGCGGATACGGTTTTACTTGG 600  
DCO174-11dD TCGTAATGGTTTTAGATGTGGTGCGTATGTTGGCGCTCGGTGCGGATACGGTTTTACTTGG 600  
A424-11dD TCGTAATGGTTTTAGATGTGGTGCGTATGTTGGCGCTCGGTGCGGATACGGTTTTACTTGG 600  
\*\*\*\*\*

DCO163-11dD CCGTGCGTTTTGTTTATGCCTTGGCAGCAGCAGGTGGACAAGGTGTGTGCGAACTTACTTGA 660  
DCO174-11dD CCGTGCGTTTTGTTTATGCCTTGGCAGCAGCAGGTGGACAAGGTGTGTGCGAACTTACTTGA 660  
A424-11dD CCGTGCGTTTTGTTTATGCCTTGGCAGCAGCAGGTGGACAAGGTGTGTGCGAACTTACTTGA 660  
\*\*\*\*\*

DCO163-11dD TTTAATTGATAAGGAAATGCGTGTGCGATGACGCTCACGGGTGCTAAGTCGATTTTCGGA 720  
DCO174-11dD TTTAATTGATAAGGAAATGCGTGTGCGATGACGCTCACGGGTGCTAAGTCGATTTTCGGA 720  
A424-11dD TTTAATTGATAAGGAAATGCGTGTGCGATGACGCTCACGGGTGCTAAGTCGATTTTCGGA 720  
\*\*\*\*\*

DCO163-11dD TATTAATACGGATTGTTTGTAGTACAGGCGATTAAC 754  
DCO174-11dD TATTAATACGGATTGTTTGTAGTACAGGCGATT--- 751  
A424-11dD TATTAATACGGATTGTTTGTAGTACAGGCGATTAAC 754  
\*\*\*\*\*

E

A424WT-ABAYE3780 ATTTGAAGATGACGATTTAATTGTGGTTGATAAACCTGCGGGTTTGTTCGGTCATGGG 60  
DCO174-ABAYE3780 ATTTGAAGATGACGATTTAATTGTGGTTGATAAACCTGCGGGTTTGTTCGGTCATGGG 60  
DCO163-ABAYE3780 ATTTGAAGATGACGATTTAATTGTGGTTGATAAACCTGCGGGTTTGTTCGGTCATGGG 60  
\*\*\*\*\*

A424WT-ABAYE3780 CCGGTTACCTGAACATCATGACAGTGCATTTAAGGGTATTGGAAAAGTTCCTTTAGC 120  
DCO174-ABAYE3780 CCGGTTACCTGAACATCATGACAGTGCATTTAAGGGTATTGGAAAAGTTCCTTTAGC 120  
DCO163-ABAYE3780 CCGGTTACCTGAACATCATGACAGTGCATTTAAGGGTATTGGAAAAGTTCCTTTAGC 120  
\*\*\*\*\*

A424WT-ABAYE3780 AAAGGTTACGCACCGTTTAGATATGGCAACCTCAGGTTTACTTATGTTTGCCAAGCATCG 180  
DCO174-ABAYE3780 AAAGGTTACGCACCGTTTAGATATGGCAACCTCAGGTTTACTTATGTTTGCCAAGCATCG 180  
DCO163-ABAYE3780 AAAGGTTACGCACCGTTTAGATATGGCAACCTCAGGTTTACTTATGTTTGCCAAGCATCG 180  
\*\*\*\*\*

A424WT-ABAYE3780 CGATGCAGAAGTTGCGGTAAGTAAAATGTTTCAGGCCAGAACAGTCAAAAAACATTATAT 240  
DCO174-ABAYE3780 CGATGCAGAAGTTGCGGTAAGTAAAATGTTTCAGGCCAGAACAGTCAAAAAACATTATAT 240  
DCO163-ABAYE3780 CGATGCAGAAGTTGCGGTAAGTAAAATGTTTCAGGCCAGAACAGTCAAAAAACATTATAT 240  
\*\*\*\*\*

A424WT-ABAYE3780 TGCTTTGGTGCAAGGCCAAGTAAAACAAGAGGGCAGTGTGAAGTTCCTACTCATTACTGA 300  
DCO174-ABAYE3780 TGCTTTGGTGCAAGGCCAAGTAAAACAAGAGGGCAGTGTGAAGTTCCTACTCATTACTGA 300  
DCO163-ABAYE3780 TGCTTTGGTGCAAGGCCAAGTAAAACAAGAGGGCAGTGTGAAGTTCCTACTCATTACTGA 300  
\*\*\*\*\*

A424WT-ABAYE3780 CTGGGAAAATCGCCCAAGACAAATTGTACATTTTGAATTAGGTAAACATGCTAAAACCTT 360  
DCO174-ABAYE3780 CTGGGAAAATCGCCCAAGACAAATTGTACATTTTGAATTAGGTAAACATGCTAAAACCTT 360  
DCO163-ABAYE3780 CTGGGAAAATCGCCCAAGACAAATTGTACATTTTGAATTAGGTAAACATGCTAAAACCTT 360  
\*\*\*\*\*

A424WT-ABAYE3780 GTTTC AACCATTTGGTTTATGATGCAACAACAGATCAAAGTCGAGTGTACTTGAGCCTGT 420  
DCO174-ABAYE3780 GTTTC AACCATTTGGTTTATGATGCAACAACAGATCAAAGTCGAGTGTACTTGAGCCTGT 420  
DCO163-ABAYE3780 GTTTC AACCATTTGGTTTATGATGCAACAACAGATCAAAGTCGAGTGTACTTGAGCCTGT 420  
\*\*\*\*\*

A424WT-ABAYE3780 GACAGGGCGTTCGCACCAGTTACGTGTACATATGATGCATATTGGGCATCCGATTATGGG 480  
DCO174-ABAYE3780 GACAGGGCGTTCGCACCAGTTACGTGTACATATGATGCATATTGGGCATCCGATTATGGG 480  
DCO163-ABAYE3780 GACAGGGCGTTCGCACCAGTTACGTGTACATATGATGCATATTGGGCATCCGATTATGGG 480  
\*\*\*\*\*

A424WT-ABAYE3780 GGACAAGTTATATCATCCTGAACCTAAACGGTTTCATTTGAATCGTATGGCTTTACACGC 540  
DCO174-ABAYE3780 GGACAAGTTATATCATCCTGAACCTAAACGGTTTCATTTGAATCGTATGGCTTTACACGC 540  
DCO163-ABAYE3780 GGACAAGTTATATCATCCTGAACCTAAACGGTTTCATTTGAATCGTATGGCTTTACACGC 540  
\*\*\*\*\*

A424WT-ABAYE3780 TGCATATCTCGCTTTTCAACATCCTTTGAAGGGAACAGACGTGGTGATTGA 591  
DCO174-ABAYE3780 TGCATATCTCGCTTTTCAACATCCTTTGAAGGGAACAGACGTGGTGATTGA 591  
DCO163-ABAYE3780 TGCATATCTCGCTTTTCAACATCCTTTGAAGGGAACAGACGTGGTGATTGA 591  
\*\*\*\*\*

F

DCO163-*filB* AACTCGCCGCATCGTAGAAGCCTTATTTGCTAAACGGTCATATTTATATGTGGGATATTG 60  
DCO174-*filB* AACTCGCCGCATCGTAGAAGCCTTATTTGCTAAACGGTCATATTTATATGTGGGATATTG 60  
A424-*filB* AACTCGCCGCATCGTAGAAGCCTTATTTGCTAAACGGTCATATTTATATGTGGGATATTG 60  
\*\*\*\*\*

DCO163-*filB* CACATCAACAAAAGCATATCTATTGACTGTTGCATCCTCTACATGACGCATATCCGAATC 120  
DCO174-*filB* CACATCAACAAAAGCATATCTATTGACTGTTGCATCCTCTACATGACGCATATCCGAATC 120  
A424-*filB* CACATCAACAAAAGCATATCTATTGACTGTTGCATCCTCTACATGACGCATATCCGAATC 120  
\*\*\*\*\*

DCO163-*filB* TTTTAATGCTAATAAGTCTTTACGCTGAGATTCAGGAAC TCAAATAACGTATT 180  
DCO174-*filB* TTTTAATGCTAATAAGTCTTTACGCTGAGATTCAGGAAC TCAAATAACGTATT 180  
A424-*filB* TTTTAATGCTAATAAGTCTTTACGCTGAGATTCAGGAAC TCAAATAACGTATT 180  
\*\*\*\*\*

DCO163-*filB* ATTATCCCAAATTTCCCTTAAAACGATTTTCATCAAAGCTGATATTCCTTAAAGCTGGATC 240  
DCO174-*filB* ATTATCCCAAATTTCCCTTAAAACGATTTTCATCAAAGCTGATATTCCTTAAAGCTGGATC 240  
A424-*filB* ATTATCCCAAATTTCCCTTAAAACGATTTTCATCAAAGCTGATATTCCTTAAAGCTGGATC 240  
\*\*\*\*\*

DCO163-*filB* AGCTACATATACTCGTCCATCTTTATAAGCTTTATATACGACAAAATGTTTAAAACCAGC 300  
DCO174-*filB* AGCTACATATACTCGTCCATCTTTATAAGCTTTATATACGACAAAATGTTTAAAACCAGC 300  
A424-*filB* AGCTACATATACTCGTCCATCTTTATAAGCTTTATATACGACAAAATGTTTAAAACCAGC 300  
\*\*\*\*\*

DCO163-*filB* ATATGAAATCGGAACAATTGCAGGTTGACCGAGTTTAACTAAATCAGAAAAC TCTCCTCG 360  
DCO174-*filB* ATATGAAATCGGAACAATTGCAGGTTGACCGAGTTTAACTAAATCAGAAAAC TCTCCTCG 360  
A424-*filB* ATATGAAATCGGAACAATTGCAGGTTGACCGAGTTTAACTAAATCAGAAAAC TCTCCTCG 360  
\*\*\*\*\*

DCO163-*filB* GTAACCACCACTCTCTAAACCAATTGCTGTGACAAAGCGTTTCATATCAAGGAGCGAAAA 420  
DCO174-*filB* GTAACCACCACTCTCTAAACCAATTGCTGTGACAAAGCGTTTCATATCAAGGAGCGAAAA 420  
A424-*filB* GTAACCACCACTCTCTAAACCAATTGCTGTGACAAAGCGTTTCATATCAAGGAGCGAAAA 420  
\*\*\*\*\*

DCO163-*filB* GCTTCGGCGTTCAATAATACGTTGATACTACCGTACTGTAGCAAACCACTCATTGTTTG 480  
DCO174-*filB* GCTTCGGCGTTCAATAATACGTTGATACTACCGTACTGTAGCAAACCACTCATTGTTTG 480  
A424-*filB* GCTTCGGCGTTCAATAATACGTTGATACTACCGTACTGTAGCAAACCACTCATTGTTTG 480  
\*\*\*\*\*

DCO163-*filB* CTGTTCCGTTAAACTCGTACCAACATAACCATTTAATAAAGTCGTAAGGGCAGCAGACCC 540  
DCO174-*filB* CTGTTCCGTTAAACTCGTACCAACATAACCATTTAATAAAGTCGTAAGGGCAGCAGACCC 540  
A424-*filB* CTGTTCCGTTAAACTCGTACCAACATAACCATTTAATAAAGTCGTAAGGGCAGCAGACCC 540  
\*\*\*\*\*

DCO163-*filB* ACAACTATAATCGTAGGCTTGTGCAACAATTCACGAAACTGGTCTTCAACAGCTGGTTT 600  
DCO174-*filB* ACAACTATAATCGTAGGCTTGTGCAACAATTCACGAAACTGGTCTTCAACAGCTGGTTT 600  
A424-*filB* ACAACTATAATCGTAGGCTTGTGCAACAATTCACGAAACTGGTCTTCAACAGCTGGTTT 600  
\*\*\*\*\*

DCO163-*filB* TATAGTAACTGGTTCAATATGATTTTCGATGAAAAGATAAATTACGTGAATCGGCAGTCTC 660  
DCO174-*filB* TATAGTAACTGGTTCAATATGATTTTCGATGAAAAGATAAATTACGTGAATCGGCAGTCTC 660  
A424-*filB* TATAGTAACTGGTTCAATATGATTTTCGATGAAAAGATAAATTACGTGAATCGGCAGTCTC 660  
\*\*\*\*\*

DCO163-*filB* TGTATAATAAACAGTTCGCCGCGGTTTTTTTTTCTATTTTCGAAGGCTTCTGTGCGANAGTA 720  
DCO174-*filB* TGTATAATAAACAGTTCGCCGCGGTTTTTTTTTCTATTTTCGAAGGCTTCTGTGCGANAGTA 720  
A424-*filB* TGTATAATAAACAGTTCGCCGCGGTTTTTTTTTCTATTTTCGAAGGCTTCTGTGCGANAGTA 720  
\*\*\*\*\*

DCO163-*filB* ATATATCAATGCTGAGCCTAAAGCAATCTCTAACATAAGCACTTGGTCTAAATGGTAGCC 780  
DCO174-*filB* ATATATCAATGCTGAGCCTAAAGCAATCTCTAACATAAGCACTTGGTCTAAATGGTAGCC 780  
A424-*filB* ATATATCAATGCTGAGCCTAAAGCAATCTCTAACATAAGCACTTGGTCTAAATGGTAGCC 780  
\*\*\*\*\*

DCO163-*filB* TAACTGGCCTTATTCA 796  
DCO174-*filB* TAACTGGCCTTATTCA 796  
A424-*filB* TAACTGGCCTTATTCA 796  
\*\*\*\*\*

# G

DCO163-*gyrA* -TGTCGTTGGGGACGTAATCGGTAAATATCACCCGCATGGTGACTTAGCTGTTTATGAAA 59  
DCO174-*gyrA* GTGTCGTTGGGGACGTAATCGGTAAATATCACCCGCATGGTGACTTAGCTGTTTATGAAA 60  
A424-*gyrA* -----ACGTAATCGGTAAATATCACCCGCATGGTGACTTAGCTGTTTATGAAA 48  
\*\*\*\*\*

DCO163-*gyrA* CCATTGTTTCGTATGGCTCAAGACTTTAGCTTACGTTATTTATTTGGTTGATGGTCAGGGTA 119  
DCO 174-*gyrA* CCATTGTTTCGTATGGCTCAAGACTTTAGCTTACGTTATTTATTTGGTTGATGGTCAGGGTA 120  
A424-*gyrA* CCATTGTTTCGTATGGCTCAAGACTTTAGCTTACGTTATTTATTTGGTTGATGGTCAGGGTA 108  
\*\*\*\*\*

DCO163-*gyrA* ACTTCGGTTCGATCGATGGTGATAGCGCTGCGGCAATGCGTTATACCGAAGTCCGTATGA 179  
DCO174-*gyrA* ACTTCGGTTCGATCGATGGTGATAGCGCTGCGGCAATGCGTTATACCGAAGTCCGTATGA 180  
A424-*gyrA* ACTTCGGTTCGATCGATGGTGATAGCGCTGCGGCAATGCGTTATACCGAAGTCCGTATGA 168  
\*\*\*\*\*

DCO163-*gyrA* CTAAGCTGGCACATGAGCTTCTTGCAGATTTAGAAAAAGACACAGTTGACTGGGAAGATA 239  
DCO174-*gyrA* CTAAGCTGGCACATGAGCTTCTTGCAGATTTAGAAAAAGACACAGTTGACTGGGAAGATA 240  
A424-*gyrA* CTAAGCTGGCACATGAGCTTCTTGCAGATTTAGAAAAAGACACAGTTGACTGGGAAGATA 228  
\*\*\*\*\*

DCO163-*gyrA* ACTACGACGGTTCGGAACGTATCCCTGAAGTACTTCCGACACGTGTTCCAACTTATTAA 299  
DCO174-*gyrA* ACTACGACGGTTCGGAACGTATCCCTGAAGTACTTCCGACACGTGTTCCAACTTATTAA 300  
A424-*gyrA* ACTACGACGGTTCGGAACGTATCCCTGAAGTACTTCCGACACGTGTTCCAACTTATTAA 288  
\*\*\*\*\*

DCO163-*gyrA* T----- 300  
DCO174-*gyrA* TTAACGGTGCTGCTGGTATC 320  
A424-*gyrA* TTAACGGTGCTG----- 300  
\*

# H

A424-*parC* -TAAACCTGTTTCAGCGCCGCATTGTCTATGCCATGAGCGAGCTAGGCTTAAAAAGCAGTG 59  
DCO174-*parC* TTAACCTGTTTCAGCGCCGCATTGTCTATGCCATGAGCGAGCTAGGCTTAAAAAGCAGTG 60  
DCO163-*parC* ---AACCTGTTTCAGCGCCGCATTGTCTATGCCATGAGCGAGCTAGGCTTAAAAAGCAGTG 57  
\*\*\*\*\*

A424-*parC* GCAAGCCAAAAAATCAGCGCGTACAGTGGGTGATGTACTTGGTAAATACCACCCACATG 119  
DCO174-*parC* GCAAGCCAAAAAATCAGCGCGTACAGTGGGTGATGTACTTGGTAAATACCACCCACATG 120  
DCO163-*parC* GCAAGCCAAAAAATCAGCGCGTACAGTGGGTGATGTACTTGGTAAATACCACCCACATG 117  
\*\*\*\*\*

A424-*parC* GTGACTCGGCATGTTATGAAGCCATGGTACTCATGGCTCAGCCATTTAGTTACCGCTATC 179  
DCO174-*parC* GTGACTCGGCATGTTATGAAGCCATGGTACTCATGGCTCAGCCATTTAGTTACCGCTATC 180  
DCO163-*parC* GTGACTCGGCATGTTATGAAGCCATGGTACTCATGGCTCAGCCATTTAGTTACCGCTATC 177  
\*\*\*\*\*

A424-*parC* CTTTAATCGAAGGTCAGGGGAACTGGGGCTCACCTGATGATCCTAAGTCTTTTGCTGCGA 239  
DCO174-*parC* CTTTAATCGAAGGTCAGGGGAACTGGGGCTCACCTGATGATCCTAAGTCTTTTGCTGCGA 240  
DCO163-*parC* CTTTAATCGAAGGTCAGGGGAACTGGGGCTCACCTGATGATCCTAAGTCTTTTGCTGCGA 237  
\*\*\*\*\*

A424-*parC* TGC GTTATACCGAAGCAAACTCTCGGCTTATAGTGAATTATGCTGAGCGAATTAGGTC 299  
DCO174-*parC* TGC GTTATACCGAAGCAAACTCTCGGCTTATAGTGAATTATGCTGAGCGAATTAGGTC 300  
DCO163-*parC* TGC GTTATACCGAAGCAAACTCTCGGCTTATAGTGAATTATGCTGAGCGAATTAGGTC 297  
\*\*\*\*\*

A424-*parC* AGGGCACTAGTGAATGGCAAGACAACCTTT--- 328  
DCO174-*parC* AGGGCACTAGTGAATGGCAAGACAACCTTTATA 332  
DCO163-*parC* AGGGCACTAGTGAATGGCAAGACAACCTTTA-- 327  
\*\*\*\*\*



**Fig. S2: ClustalW-based alignment of PCR-derived sequences mapping to selected target genes in *Acinetobacter baumannii* A424 and its two TnAbaR23-minus mutants.** Gene-specific primers were used to amplify and subsequently sequence internal segments of the following genes: **(A)** ABAYE3778, **(B)** *filE*, **(C)** *ompA*, **(D)** *lldD*, **(E)** ABAYE3780, **(F)** *filB*, **(G)** *gyrA*, and **(H)** *parC*. For the *gyrA* and *parC* alignments, residues shown in green indicate codons that are commonly implicated in ciprofloxacin resistance in *Acinetobacter* but that are 'unmutated' in these strains (GyrA, Gly81 and Ala84; ParC, Ser80 and Glu84), whilst residues shown in red highlight the GyrA Ser83Leu ciprofloxacin resistance-associated substitution common to all three strains. Numbers shown to the right correspond to sequencing coordinates.

**Table S1. Details of oligonucleotide primers used in this study**

| Number | Name     | Sequence 5' -> 3'                                    | Reference  |
|--------|----------|------------------------------------------------------|------------|
| PR121  | 5'-CS    | GGCATCCAAGCAGCAAG                                    | This study |
| PR122  | 3'-CS    | AAGCAGACTTGACCTGA                                    | This study |
| PR126  | int1R    | CCCGAGGCATAGACTGTA                                   | This study |
| PR131  | 1F       | CTTAATTGCCTCTGGTCAAC                                 | S12        |
| PR135  | 4F       | TATCAGCAGCAAAACGATGG                                 | S12        |
| PR136  | 2R       | TTGGGGATTCTGTCCGTAAG                                 | S12        |
| PR138  | 3R       | CTGCTACGGCTGAAACATCC                                 | S12        |
| PR164  | trxBR    | AAGTGTCCTCCATTTTTGC                                  | This study |
| PR165  | tnpAF    | GACGAAATGCACTTCCAGGT                                 | This study |
| PR167  | arsHR    | TGCACCACCTGCTAATGGTA                                 | This study |
| PR168  | arsRF    | CACAACCCTGAATGTGGTACA                                | This study |
| PR301  | arsRR    | GCAGACATTTGCTCAAACCTCA                               | This study |
| PR302  | tnpAR    | ACCTGGAAGTGCATTTTCGTC                                | This study |
| PR303  | orf5F    | TCGCAGAACGCCTAGAACTC                                 | This study |
| PR304  | pbrR-R   | GTTCGTAGAAGCGGATCGTC                                 | This study |
| PR320  | oxa51a   | CTAATAATTGATCTACTCAAG                                | This study |
| PR321  | oxa51b   | CCAGTGGATGGATGGATAGATTATC                            | This study |
| PR351  | Gm-F     | CGAATTAGCTTCAAAAGCGCTCTGA                            | S2         |
| PR352  | Gm-R     | CGAATTGGGGATCTTGAAGTTCCT                             | S2         |
| PR356  | AbaRURGm | TCAGAGCGCTTTTGAAGCTAATTCGGTAAATGACAGCGGTTTAC         | This study |
| PR357  | AbaRDFGm | AGGAACTTCAAGATCCCCAATTCGTATTTGTGGAAGTACAACC          | This study |
| PR533  | trkAF*   | aaacgcaaaagaaaaTGCCGGCACTTTAAAAATACTTTAATAACCC       | This study |
| PR544  | 2F       | TCCATTTTACCGCCACTTTC                                 | S12        |
| PR545  | 4R       | AATCGATGCGGTGCGAGTAAC                                | S12        |
| PR572  | AbaRUF   | ATAAGAATGCGGCCGCTACAAAAAAGCAGGCTTATTCGCTTTGGTTTTGCAG | This study |

|       |           |                                                     |            |
|-------|-----------|-----------------------------------------------------|------------|
| PR573 | AbaRDR    | ATAAGAATGCGCCGCTACAAGAAAGCTGGGTGCCTCTCATTGAGGTTGAGG | This study |
| PR720 | AbaRDR2   | CGTTTAGAAGCGCTACAA                                  | This study |
| PR721 | 3664R^    | ggcgtaattaaCCACTTGGGTACAGTAAC                       | This study |
| PR722 | 3663R^    | ggcgtaattaaGGTTCATCCATGACAGTC                       | This study |
| PR723 | 3662R^    | ggcgtaattaaCGTATCAACCACGATGAGA                      | This study |
| PR768 | aadA1R    | GTTCCATAGCGTTAAGGTTTCATT                            | This study |
| PR804 | AbaRUF2   | CGCGGTATGGCTGAACTA                                  | This study |
| PR806 | sacB-R-Gm | AGGAACTTCAAGATCCCCAATTCGTCTTTAGGCCCGTAGTCTGC        | This study |
| PR807 | sacB-F    | CGGCATTTTCTTTTGC GTT                                | This study |
| PR871 | sul1R     | ATGATTCATATCGTAAAGTG                                | This study |
| PR872 | 3662F     | CTCCAGCAAAGCGAATGTT                                 | This study |
| PR873 | tniAintF  | ATGAAGCTTGGCAGATTGCT                                | This study |
| PR874 | tniAintR  | CCATTTAACGATTGGGGATG                                | This study |
| PR875 | merAF     | AGATGTTCTGGGCTACTGGTG                               | This study |
| PR876 | merAR     | TCAAGGAAGCCTTGGAGAAA                                | This study |
| PR881 | tetR-F    | CGTCTGTTTCCAACCTCGTGA                               | This study |
| PR901 | tetR-R    | GAGCTGTTGAACGAGGTTGG                                | This study |
| PR902 | aphA1-F   | AGAAAACCTACCGAGGCAGT                                | This study |
| PR903 | aphA1R    | AAACGTCTTGCTCGAGGC                                  | This study |
| PR904 | lspAF     | GGCAAACATCTGTCACCGTA                                | This study |
| PR905 | lspAR     | AAGTAAGGCACCGAGGACAA                                | This study |
| PR906 | aadA1F    | GAAGCCACACAGTGATATTGATTT                            | This study |
| PR907 | RH377-R   | GACACAACGCAGGTCACATTGAT                             | S11        |
| PR908 | RH212-R   | GCATATCGCGACCTGAAAGC                                | S11        |
| PR909 | VEB-F     | TGTGTATTCAAATGCTCAAACCTGAC                          | This study |
| PR910 | VEB-R     | AATTCCACGTTATTTTGAATGT                              | This study |
| PR911 | TEM-F     | CCGTGTCGCCCTTATTCC                                  | S7         |
| PR912 | TEM-R     | AGGCACCTATCTCAGCGA                                  | S7         |

|       |         |                           |            |
|-------|---------|---------------------------|------------|
| PR913 | oxa23F  | GATGTGTCATAGTATTCGTCGT    | This study |
| PR914 | oxa23R  | TCACAACAACATAAAGCACTGT    | This study |
| PR915 | IMP-F   | CATGGTTTGGTGGTTCTTGT      | This study |
| PR916 | IMP-R   | ATAATTTGGCGGACTTTGGC      | This study |
| PR917 | VIM-F   | ATTGGTCTATTTGACCGCGTC     | This study |
| PR918 | VIM-R   | TGCTACTCAACGACTGAGCG      | This study |
| PR919 | aac6'R  | CGCATTTTTTCATAACAGGCAATAG | This study |
| PR920 | cadRF   | CAGCGGTACAGGACTGATGA      | This study |
| PR921 | cadAR   | CCTCCCGATGTTTGGATATG      | This study |
| PR940 | pecMF   | CAGCGTCTGATCCAAGAACA      | This study |
| PR941 | pecMR   | TACCTGCCGAACCTTCTCACC     | This study |
| PR942 | IS26F   | AGCGTGACATCATTCTGTGG      | This study |
| PR943 | IS26R   | CGTAAGCCGTCTTCATGGAT      | This study |
| PR944 | oxa66F  | AATCCAAATCACAGCGCTTC      | This study |
| PR945 | oxa66R  | GCTGAACAACCCATCCAGTT      | This study |
| PR946 | folAF   | CTTGCTGTTGCTTGCAGTT       | This study |
| PR947 | folAR   | CGCAATGGACAAAAATCACT      | This study |
| PR948 | ISAb1-F | TGAGAGTCGTCCATGCTTCTT     | This study |
| PR949 | ISAb1-R | CGCTCATCATGCTTGTGATT      | This study |
| PR953 | aac6'F  | TGCGTTACAGAAAAGCGATG      | This study |
| PR954 | adeAF   | ATCGCTAACAAAGGCTTGAA      | This study |
| PR955 | adeAR   | CGCCCCCTCAGCTATAGAA       | This study |
| PR956 | oxa10F  | AATTATCGCGTGTCTTTGAGTA    | This study |
| PR957 | oxa10R  | CTCACTTTCCATGATTTTGGTG    | This study |
| PR958 | SHV-F   | ATGCGTTATATTCGCCTGTG      | This study |
| PR959 | SHV-R   | TTAGCGTTGCCAGTGCTC        | This study |
| PR960 | arr2F   | CAGCCAAATCCCAACAATTAAGG   | This study |
| PR961 | arr2R   | CCTCCCAGTCTTCAACAACG      | This study |
| PR962 | folPF   | GACGGTGTTGCGCATTCT        | This study |

|        |         |                         |            |
|--------|---------|-------------------------|------------|
| PR963  | foIPR   | AGGGTTTCCGAGAAGGTGAT    | This study |
| PR964  | lysRF   | CGAGTGCCAATGATGACCT     | This study |
| PR965  | lysRR   | AAGCATGGCTGCTGACAAC     | This study |
| PR966  | tetA(A) | GCTACATCCTGCTTGCCTTC    | S8         |
| PR967  | tetA(A) | CATAGATCGCCGTGAAGAGG    | S8         |
| PR968  | RH513   | GTAAGTTGTAATTCATTAAGCAT | S11        |
| PR969  | RH514   | TCCCAATGGCATCGTAAAGAACA | S11        |
| PR970  | ybjAF   | CGCTGCGGCAATAACATTAC    | This study |
| PR971  | ybjAR   | CCTCCCAGAGCCTGATAAAA    | This study |
| PR975  | clmA5F  | TACGACAGCGAGCACAATTC    | This study |
| PR975  | clmA5R  | AAGACAGACCGAGCACGACT    | This study |
| PR976  | aphEF   | ATGATGTCTAACAGCAAAGT    | This study |
| PR977  | ahpER   | TCAACCCCAAGTAAGAGG      | This study |
| PR978  | ebrF    | GCGAAGTAATCGCAACATCC    | This study |
| PR979  | ebrR    | GATCGGGCGAGCAAAAAG      | This study |
| PR980  | topAF   | GCCGACCGTATTTTGCTG      | This study |
| PR981  | topAR   | AGGTCTTGCACTCGGGATAG    | This study |
| PR1001 | orf5F2  | GAGGTTGTGCGGCTGATG      | This study |
| PR1002 | orf5R2  | TTCTGCGATGAAGGTTGGAT    | This study |
| PR1003 | oxa69F  | GCTGAACAACCCATCCAGTT    | This study |
| PR1004 | oxa69R  | CCATCAAGGTCAAAGTCAACAA  | This study |
| PR1008 | tnpAWF  | AGGACAAGAACCGTGAAG      | This study |
| PR1009 | ArmAf   | TGCATCAAATATGGGGGTCT    | S1         |
| PR1010 | ArmAr   | GGATTGAAGCCACAACCAAA    | S1         |
| PR1011 | gyrA1   | AAATCTGCCCCGTGTCGTTGGT  | S14        |
| PR1012 | gyrA2   | GCCATACCTACGGCGATAAC    | S14        |
| PR1013 | parC1   | AAACCTGTTCAGCGCCGCATT   | S12        |
| PR1014 | parC2   | AAAGTTGTCTTGCCATTCACT   | S12        |
| PR1023 | CTX-M2F | TTTGCGATGTGCAGTACCAGTAA | This study |

|        |              |                            |            |
|--------|--------------|----------------------------|------------|
| PR1024 | CTX-M2R      | CGATATCGTTGGTGGTGCCATA     | This study |
| PR1025 | qnrAf        | ATTTCTCACGCCAGGATTTG       | S1         |
| PR1026 | qnrAr        | GATCGGCAAAGGTTAGGTCA       | S1         |
| PR1073 | pecMF2       | TCGCACCAATCCACCTGC         | This study |
| PR1074 | topAF2       | CTATCCCGAGTGCAAGACCT       | This study |
| PR1108 | topAF3       | GCAACCTGACCGATGGAA         | This study |
| PR1109 | pecMR2       | TGTTCTTGGATCAGACGCTG       | This study |
| PR1111 | pecMF3       | GCCACTTCACCCACTTGA         | This study |
| PR1212 | sul1C        | GTATTGCGCCGCTCTTAGAC       | This study |
| PR1213 | sul1D        | CCGACTTCAGCTTTTGAAGG       | This study |
| PR1247 | adeBF        | CTTGCAATTTACGTGTGGTGT      | This study |
| PR1248 | adeBR        | GCTTTTCTACTGCACCCAAA       | This study |
| PR1249 | adeJF        | GGTCATTAATATCTTTGGC        | This study |
| PR1250 | adeJR        | GGTACGAATACCGCTGTCA        | This study |
| PR1758 | ModA-F       | TTAAAGACTAAGCAAAGAA        | This study |
| PR1759 | ModC-R       | GCAAAGTCAGTATCTCACA        | This study |
| PR1760 | ModF-F       | TGTGCCACGGCGTCATTGCT       | This study |
| PR1761 | ModG-R       | GCTCAATCATCGACAGTGGCG      | This study |
| PR1762 | ModG-F       | ATCAAGCAGGGCACCGTCAC       | This study |
| PR1763 | ModI-R       | CAAATTGCAGTTCGCGCTTAGC     | This study |
| PR1764 | ModI-F       | CCGGCCCTTTGTTTCATCCT       | This study |
| PR1765 | ModE-R       | TATCCCTAGTTCCTTCGGCGGCAAGT | This study |
| PR1766 | ModC-F       | CATCCGCGATCATTTGAATCAGTTC  | This study |
| PR1767 | ModK-R       | CGTAGCAGCCGTTGATAAAGTTGTC  | This study |
| PR1776 | OXA-51-likeF | TAATGCTTTGATCGGCCTTG       | S15        |
| PR1777 | OXA-51-likeR | TGGATTGCACTTCATCTTGG       | S15        |
| PR1778 | OXA-23-likeF | GATCGGATTGGAGAACCAGA       | S15        |
| PR1779 | OXA-23-likeR | ATTTCTGACCGCATTTCCAT       | S15        |

|        |              |                       |     |
|--------|--------------|-----------------------|-----|
| PR1780 | OXA-24-likeF | GGTTAGTTGGCCCCCTTAAA  | S15 |
| PR1781 | OXA-24-likeR | AGTTGAGCGAAAAGGGGATT  | S15 |
| PR1801 | OXA-58-likeF | AAGTATTGGGGCTTGTGCTG  | S15 |
| PR1802 | OXA-58-likeR | CCCCTCTGCGCTCTACATAC  | S15 |
| PR1803 | OXA-143-F    | TGGCACTTTCAGCAGTTCCT  | S3  |
| PR1804 | OXA-143-R    | TAATCTTGAGGGGGCCAACC  | S3  |
| PR1805 | GIM-F1       | TCAATTAGCTCTTGGGCTGAC | S6  |
| PR1806 | GIM-R1       | CGGAACGACCATTTGAATGG  | S6  |
| PR1807 | SPM-F1       | CTAAATCGAGAGCCCTGCTTG | S6  |
| PR1808 | SPM-R1       | CCTTTTCCGCGACCTTGATC  | S6  |
| PR1809 | Int1F        | CAGTGGACATAAGCCTGTTC  | S4  |
| PR1810 | Int1R        | CCCGAGGCATAGACTGTA    | S4  |
| PR1811 | RH935        | GCAGTCGCCCTAAAACAAAG  | S9  |
| PR1812 | RH936        | CCCGTATGCCCAACTTTGTA  | S9  |
| PR1813 | NDM1-F       | GCGCAACACAGCCTGACTTT  | S5  |
| PR1814 | NDM1-R       | CAGCCACCAAAGCGATGTC   | S5  |
| PR1832 | CTXM9-F      | GTGACAAAGAGAGTGCAACGG | S10 |
| PR1833 | CTXM9-R      | ATGATTCTCGCCGCTGAAGCC | S10 |

**Footnotes:**

\* Nucleotides complementary to the *sacB* cassette are shown in lower case

^ Nucleotides carrying an introduced *PacI* restriction site are shown in lower case

**Table S2. TnAbaR and antibiotic resistance-associated gene- and/or locus-specific PCR survey**

| Target gene(s)                  | NCBI                 | TnAbaR  | Primer combination | <i>In silico</i> prediction (bp) <sup>‡</sup> | AYE | A424 | DCO163      | DCO174      |
|---------------------------------|----------------------|---------|--------------------|-----------------------------------------------|-----|------|-------------|-------------|
| <i>intI1</i>                    | ABAYE3633            | TnAbaR1 | PR1809/PR1810      | 160 (AYE)                                     | +   | -    | ±           | ±           |
| <i>lspA</i>                     | ABAYE3651            | TnAbaR1 | PR904/PR905        | 435 (AYE)                                     | +   | +    | -           | -           |
| <i>ebr</i>                      | ABAYE3569            | TnAbaR1 | PR978/PR979        | 271 (AYE)                                     | +   | +    | + (~1.8 Kb) | + (~1.8 Kb) |
| <i>adeB</i>                     | ABAYE1822            | NA      | PR1247/PR1248      | 169 (AYE)                                     | +   | +    | +           | +           |
| <i>ybjA</i>                     | ABAYE3588            | TnAbaR1 | PR970/PR971        | 242 (AYE)                                     | +   | +    | -           | -           |
| <i>tetA(A)</i>                  | ABAYE3597            | TnAbaR1 | PR966/PR967        | 210 (AYE)                                     | +   | +    | -           | -           |
| <i>cadAR</i>                    | ABAYE3559, ABAYE3560 | TnAbaR1 | PR920/PR921        | 1,045 (AYE)                                   | +   | +    | -           | -           |
| <i>merAD</i>                    | ABAYE3605, ABAYE3606 | TnAbaR1 | PR875/PR876        | 1,143 (AYE)                                   | +   | +    | -           | -           |
| <i>pecM</i>                     | ABAYE3596            | TnAbaR1 | PR940/PR941        | 696 (AYE)                                     | +   | +    | -           | -           |
| <i>adeB</i> -like               | ABAYE0747            | NA      | PR1249/PR1250      | 222 (AYE)                                     | +   | +    | +           | +           |
| <i>tniA</i>                     | ABAYE3666            | TnAbaR1 | PR873/PR874        | 1,055 (AYE)                                   | +   | +    | -           | -           |
| <i>orf5</i> <sub>In2-type</sub> | ABAYE3567            | TnAbaR1 | PR1001/PR1002      | 426 (AYE)                                     | +   | +    | + (~1.7 kb) | + (~1.7 kb) |
| <i>aadA1</i>                    | ABAYE3570            | TnAbaR1 | PR906/PR768        | 397 (AYE)                                     | +   | +    | -           | -           |
| <i>aacC1</i>                    | ABAYE3578            | TnAbaR1 | PR1811/PR1812      | 456 (AYE)                                     | +   | -    | +           | +           |
| <i>catA</i>                     | ABAYE3587            | TnAbaR1 | PR968/PR969        | 594 (AYE)                                     | +   | -    | -           | -           |
| <i>folA</i>                     | ABAYE3315            | NA      | PR946/PR947        | 425 (AYE)                                     | +   | +    | +           | +           |
| <i>bla</i> <sub>OXA-69</sub> *  | ABAYE2122            | NA      | PR1003/PR1004      | 545 (AYE)                                     | +   | +    | +           | +           |
| <i>trkA-trxB</i>                | ABAYE3661, ABAYE3662 | TnAbaR1 | PR533/PR164        | 1,891 (AYE)                                   | +   | +    | -           | -           |
| <i>arsCRCBH</i>                 | ABAYE3656-ABAYE3660  | TnAbaR1 | PR167/PR168        | 2,688 (AYE)                                   | +   | +    | -           | -           |
| <i>topA</i>                     | AB57_0262            | TnAbaR3 | PR980/PR981        | 1,555 (AB0057)                                | -   | +    | -           | -           |
| <i>orf4-sup</i>                 | ABAYE3552, ABAYE3553 | TnAbaR1 | PR138/PR871        | 2,982 (AYE)                                   | +   | +    | -           | -           |
| <i>adeA</i>                     | ABAYE1821            | NA      | PR954/PR955        | 159 (AYE)                                     | +   | +    | +           | +           |
| <i>bla</i> <sub>OXA-66</sub> *  | ACICU_01560          | NA      | PR944/PR945        | 637 (ACICU)                                   | +   | +    | +           | +           |
| <i>qnrA</i>                     | GI:66474467          | NA      | PR1025/PR1026      | 657 (AY931017.1)                              | -   | -    | -           | -           |
| <i>tnpA</i> <sub>IS26</sub>     | ABAYE3576            | TnAbaR1 | PR942/PR943        | 561 (AYE)                                     | +   | +    | +           | +           |



|                                   |                |                 |               |                  |   |   |   |   |
|-----------------------------------|----------------|-----------------|---------------|------------------|---|---|---|---|
| <i>ISAbal</i>                     | ABAYE0193      | NA              | PR948/PR949   | 877 (AYE)        | + | + | + | + |
| <i>lysR</i>                       | ABAYE3636      | Tn <i>AbaR1</i> | PR964/PR965   | 660 (AYE)        | + | - | - | - |
| <i>sul1</i>                       | ABAYE3612      | Tn <i>AbaR1</i> | PR1212/PR1213 | 408 (AYE)        | + | + | - | - |
| <i>aphE</i>                       | ABAYE3648      | Tn <i>AbaR1</i> | PR976/PR977   | 837 (AYE)        | + | - | - | - |
| <i>aphA1</i>                      | ABAYE3578      | Tn <i>AbaR1</i> | PR902/PR903   | 701 (AYE)        | + | - | - | - |
| <i>aadB</i>                       | ABAYE3622      | Tn <i>AbaR1</i> | PR907/PR908   | 524 (AYE)        | + | - | - | - |
| <i>aac6'</i>                      | ABAYE3630      | Tn <i>AbaR1</i> | PR953/PR919   | 416 (AYE)        | + | - | - | - |
| <i>armA</i>                       | GI:156105450   | NA              | PR1009/PR1010 | 214 (EUO14811.1) | - | - | - | - |
| <i>tetR(G)</i>                    | ABAYE3639      | Tn <i>AbaR1</i> | PR881/PR901   | 505 (AYE)        | + | - | - | - |
| <i>clmA</i>                       | ABAYE3620      | Tn <i>AbaR1</i> | PR974/PR975   | 1034 (AYE)       | + | - | - | - |
| <i>bla</i> <sub>OXA-58-like</sub> | ACICU_p0019    | NA              | PR1801/PR1802 | 599 (ACICU)      | - | - | - | - |
| <i>bla</i> <sub>IMP</sub>         | GI:4210822     | NA              | PR915/PR916   | 448 (AJ223604)   | - | - | - | - |
| <i>bla</i> <sub>VIM</sub>         | GI:14133992    | NA              | PR917/PR918   | 780 (AF369871.1) | - | - | - | - |
| <i>bla</i> <sub>TEM</sub>         | AB57_0283      | Tn <i>AbaR3</i> | PR911/PR912   | 824 (AB0057)     | - | - | - | - |
| <i>bla</i> <sub>SHV</sub>         | GI:18656796    | NA              | PR958/PR959   | 861 (AAL77983.1) | - | - | - | - |
| <i>bla</i> <sub>VEB-1</sub>       | ABAYE3623      | Tn <i>AbaR1</i> | PR909/PR910   | 830 (AYE)        | + | - | - | - |
| <i>bla</i> <sub>CTX-M-9</sub>     | GI:16357504    | NA              | PR1832/PR1833 | 857 (pMSP071)    | - | - | - | - |
| <i>bla</i> <sub>CTX-M-2</sub>     | GI:74055071    | NA              | PR1023/PR1024 | 544 (AAZ95872.1) | - | - | - | - |
| <i>arr-2</i>                      | ABAYE3621      | Tn <i>AbaR1</i> | PR960/PR961   | 401 (AYE)        | + | - | - | - |
| <i>bla</i> <sub>OXA-51-like</sub> | ABAYE2122      | NA              | PR1776/PR1777 | 353 (AYE)        | + | + | + | + |
| <i>bla</i> <sub>OXA-23-like</sub> | AB57_0551      | Tn <i>AbaR4</i> | PR1778/PR1779 | 501 (AB0057)     | - | - | - | - |
| <i>bla</i> <sub>OXA-24-like</sub> | GI: 258445192  | NA              | PR1780/PR1781 | 249 (GQ377752.1) | - | - | - | - |
| <i>bla</i> <sub>OXA-143</sub>     | GI:261348124   | NA              | PR1803/PR1804 | 150 (GQ861437.1) | - | - | - | - |
| <i>bla</i> <sub>GIM</sub>         | GI:42516777    | NA              | PR1805/PR1806 | 72 (AJ620678.1)  | - | - | - | - |
| <i>bla</i> <sub>SPM</sub>         | EMBL: AJ492820 | NA              | PR1807/PR1808 | 798 (AJ492820)   | - | - | - | - |
| <i>bla</i> <sub>NDM1</sub>        | GI:310892440   | NA              | PR1813/PR1814 | 155 (HQ256747.1) | - | - | - | - |
| <i>bla</i> <sub>OXA-10-like</sub> | ABAYE3619      | Tn <i>AbaR1</i> | PR956/PR957   | 760 (AYE)        | + | - | - | - |

**Footnote:**

\* primers used may have resulted in amplification of other *bla* genes

‡ Predicted sizes of amplicons with templates as indicated in brackets (strain names for genome sequences or GenBank accession numbers)

±, faint bands as compared to AYE

**Table S3. PCR mapping of TnAbaR23**

| Primer combination | <i>In silico</i> prediction (bp) | AYE | A424        | DCO163 | DCO174 |
|--------------------|----------------------------------|-----|-------------|--------|--------|
| PR545/PR723        | 4,114 (AYE)                      | +   | +           | -      | -      |
| PR545/PR721        | 7,194 (AYE)                      | +   | +           | ±      | ±      |
| PR872/PR168        | 8,464 (AYE)                      | +   | +           | -      | -      |
| PR167/PR302        | 5,566 (AYE)                      | +   | +           | -      | -      |
| PR872/PR905        | 11,166 (AYE)                     | +   | +           | -      | -      |
| PR167/PR921        | 4,755 (AYE)                      | +   | +           | -      | -      |
| PR872/PR131        | 83,727 (AYE)                     | -   | -           | -      | -      |
| PR920/PR131        | 7,710 (AYE)                      | +   | +           | -      | -      |
| PR138/PR131        | 4,110 (AYE)                      | +   | +           | -      | -      |
| PR301/PR131        | 75,241 (AYE)                     | -   | -           | -      | -      |
| PR165/PR131        | 5,874 (AYE)                      | +   | +           | -      | -      |
| PR1008/PR131       | 4,841 (AYE)                      | +   | +           | -      | -      |
| PR545/PR874        | 2,465 (AYE)                      | +   | +           | -      | -      |
| PR873/PR723        | 2,704 (AYE)                      | +   | +           | -      | -      |
| PR872/PR168        | 8,464 (AYE)                      | +   | +           | -      | -      |
| PR167/PR921        | 4,755 (AYE)                      | +   | +           | -      | -      |
| PR301/PR905        | 2,680 (AYE)                      | +   | +           | -      | -      |
| PR904/PR126        | 4,949 (AYE)                      | +   | -           | -      | -      |
| PR121/PR921        | 8,338 (AYE)                      | +   | -           | -      | -      |
| PR303/PR921        | 3,844 (AYE)                      | +   | +           | -      | -      |
| PR962/PR876        | 5,499 (AYE)                      | +   | +           | -      | -      |
| PR966/PR971        | 3,904 (AYE)                      | +   | +           | -      | -      |
| PR904/PR871        | 5,337 (AYE)                      | +   | +           | -      | -      |
| PR970/PR902        | 11,462 (AYE)                     | +   | -           | -      | -      |
| PR121/PR122        | 1,242 & 3,080 & 7,148 (AYE)      | +^  | -           | -      | -      |
| PR1758/PR1759      | 2,580 (AYE)                      | +   | +           | -      | -      |
| PR1766/PR1765      | 5,148 (AB0057)                   | -   | +           | -      | -      |
| PR1760/PR1761      | 5,887 (AB0057)                   | -   | +           | -      | -      |
| PR1762/PR1763      | 17,203 (AYE)                     | -   | + (3.9 kb)* | -      | -      |
| PR1764/PR1767      | 4,195 (AYE)                      | +   | +           | -      | -      |

**Footnotes:**

±, faint bands as compared to AYE and A424

\*, 3.9 kb amplicon size predicted from A424 genome sequence data

Orange shading, PCR assays performed following availability of A424 whole genome sequence data

^, all three expected bands were detected

**Table S4. CDS identified in TnAbaR1 in *A. baumannii* AYE (NC\_010410) <sup>a</sup>**

| Locus tag in AYE (NC_010410) / TnAbaR1 (CT025832) | Coordinates in AYE |         | Locus tag in TnAbaR1 | Orientation | Module | Description                                               |
|---------------------------------------------------|--------------------|---------|----------------------|-------------|--------|-----------------------------------------------------------|
|                                                   | start              | end     |                      |             |        |                                                           |
| ABAYE3668                                         | 3696928            | 3696245 |                      | -           |        | C-terminal ComM, Mg <sup>2+</sup> chelatase               |
| ABAYE3667                                         | 3696168            | 3695410 | TnAbaR1_01           | +           | A      | TniA transposition protein A                              |
| ABAYE3666                                         | 3695409            | 3693499 | TnAbaR1_02           | +           | A      | TniB transposition protein B                              |
| ABAYE3665                                         | 3693494            | 3692574 | TnAbaR1_03           | +           | A      | TniC transposition helper protein C                       |
| ABAYE3664                                         | 3692544            | 3691429 | TnAbaR1_04           | +           | A      | Orf 2 hypothetical protein                                |
| ABAYE3663                                         | 3691451            | 3689988 | TnAbaR1_05           | +           | A      | Orf 3 hypothetical protein                                |
| ABAYE3662                                         | 3689884            | 3688763 | TnAbaR1_06           | -           | B      | TrkA putative monooxygenase                               |
| ABAYE3661                                         | 3688715            | 3687762 | TnAbaR1_07           | -           | B      | TrxB thioredoxin reductase                                |
| ABAYE3660                                         | 3687744            | 3687040 | TnAbaR1_08           | -           | C      | ArsH arsenic resistance protein                           |
| ABAYE3659                                         | 3687034            | 3685991 | TnAbaR1_09           | -           | C      | ArsB transmembrane protein of arsenate pump               |
| ABAYE3658                                         | 3685983            | 3685510 | TnAbaR1_10           | -           | C      | ArsC arsenate reductase                                   |
| ABAYE3657                                         | 3685503            | 3685171 | TnAbaR1_11           | -           | C      | ArsR arsenite inducible repressor                         |
| ABAYE3656                                         | 3685125            | 3684625 | TnAbaR1_12           | -           | C      | ArsC arsenate reductase                                   |
| ABAYE3655                                         | 3684488            | 3683961 | TnAbaR1_13           | -           | C      | Truncated N-terminal end of UspA universal stress protein |
| ABAYE3654                                         | 3683868            | 3683446 | TnAbaR1_14           | -           | D      | Cad R transcriptional regulator, MerR family              |
| ABAYE3653                                         | 3683365            | 3682469 | TnAbaR1_15           | +           | D      | Cad A heavy metal detoxification protein                  |
| ABAYE3651                                         | 3682465            | 3681953 | TnAbaR1_16           | +           | D      | LspA lipoprotein signal peptide                           |
| ABAYE3650                                         | 3681931            | 3680642 | TnAbaR1_17           | +           | D      | Transposase IS204/IS1001/IS1096/IS1165 family             |
| ABAYE3649                                         | 3680620            | 3680489 | TnAbaR1_18           | +           | E      | Truncated Sat, streptomycin 3"-adenyltransferase          |
| ABAYE3648                                         | 3680492            | 3679656 | TnAbaR1_19           | +           | E      | StrA streptomycin 3"-kinase                               |
| ABAYE3647                                         | 3679665            | 3678820 | TnAbaR1_20           | +           | E      | StrB streptomycin 3"-kinase                               |
| 1_780                                             | 3678848            | 3678498 | TnAbaR1_21           | -           | E      | TnpM transposase                                          |

|                       |                |         |                            |   |   |                                                                         |
|-----------------------|----------------|---------|----------------------------|---|---|-------------------------------------------------------------------------|
| ABAYE3646             | 3678559        | 3677546 | TnAbaR1_22                 | - | E | Int integrase/recombinase                                               |
| ABAYE3645             | 3677616        | 3677386 | TnAbaR1_23                 | + | E | Truncated Sat, streptomycin acetyl-transferase                          |
| ABAYE3644             | 3677389        | 3676916 | <a href="#">TnAbaR1_24</a> | + | E | <a href="#">Drfl dihydrofolate reductase type I</a>                     |
| <b>New annotation</b> | 3676822        | 3676343 | TnAbaR1_25                 | + | E | Hypothetical protein                                                    |
| ABAYE3642             | 3676212        | 3675865 | <a href="#">TnAbaR1_26</a> | + | E | <a href="#">QacEdelta1</a>                                              |
| ABAYE3641             | <b>3675958</b> | 3674975 | TnAbaR1_27                 | + | E | Truncated Sul1 dihydropteroate synthase type-1                          |
| ABAYE3640             | 3674758        | 3673544 | <a href="#">TnAbaR1_28</a> | + | E | <a href="#">CmlA chloramphenicol and florfenicol resistance protein</a> |
| ABAYE3639             | 3673337        | 3672711 | <a href="#">TnAbaR1_29</a> | - | E | <a href="#">TetR tetracycline repressor protein, class G</a>            |
| ABAYE3637             | 3672607        | 3671432 | <a href="#">TnAbaR1_30</a> | + | E | <a href="#">TetA tetracycline repressor protein, class G</a>            |
| ABAYE3636             | 3671411        | 3670686 | TnAbaR1_31                 | + | E | LysR transcription regulator                                            |
| 1_732                 | 3670594        | 3669062 | TnAbaR1_32                 | - | E | ISCR3C transposase                                                      |
| ABAYE3633             | 3668835        | 3668182 | TnAbaR1_33                 | - | E | GroEL-integrase fusion protein                                          |
| ABAYE3631             | 3668252        | 3667998 | TnAbaR1_34                 | + | E | Truncated Sat, streptothricin acetyl-transferase                        |
| ABAYE3630             | <b>3668004</b> | 3667408 | <a href="#">TnAbaR1_35</a> | + | E | <a href="#">Aac6' aminoglycoside 6-acetyltransferase</a>                |
| ABAYE3629             | 3667456        | 3665606 | TnAbaR1_36                 | - | E | RecG ATP-dependent DNA helicase                                         |
| 1_710                 | 3665481        | 3663937 | TnAbaR1_37                 | - | E | ISCR3C transposase                                                      |
| ABAYE3627             | 3663798        | 3663145 | TnAbaR1_38                 | - | E | GroEL-integrase fusion protein                                          |
| ABAYE3625             | 3663215        | 3663030 | TnAbaR1_39                 | + | E | Truncated aminoglycoside adenylyltransferase                            |
| ABAYE3624             | 3663020        | 3661770 | TnAbaR1_40                 | - | E | Transposase of IS10A, IS4 family                                        |
| ABAYE3623             | 3661636        | 3660737 | <a href="#">TnAbaR1_41</a> | + | E | <a href="#">bla(VEB-1) <math>\beta</math>-lactamase</a>                 |
| ABAYE3622             | 3660592        | 3660059 | <a href="#">TnAbaR1_42</a> | + | E | <a href="#">AadB aminoglycoside adenylyltransferase</a>                 |
| ABAYE3621             | 3660013        | 3659522 | <a href="#">TnAbaR1_43</a> | + | E | <a href="#">Arr-2 rifampin ADP-ribosylating transferase</a>             |
| ABAYE3620             | <b>3659255</b> | 3657942 | <a href="#">TnAbaR1_44</a> | + | E | <a href="#">CmlA chloramphenicol resistance protein</a>                 |
| ABAYE3619             | 3657677        | 3656877 | <a href="#">TnAbaR1_45</a> | + | E | <a href="#">bla(OXA-10) <math>\beta</math>-lactamase</a>                |
| ABAYE3618             | 3656899        | 3656069 | <a href="#">TnAbaR1_46</a> | + | E | <a href="#">AadA1 aminoglycoside adenylyltransferase</a>                |
| ABAYE3617             | 3655905        | 3655558 | <a href="#">TnAbaR1_47</a> | + | E | <a href="#">QacEdelta1</a>                                              |

|           |         |         |            |   |   |                                                                |
|-----------|---------|---------|------------|---|---|----------------------------------------------------------------|
| ABAYE3616 | 3655651 | 3654725 | TnAbaR1_48 | + | E | Sul1 dihydropteroate synthase type-1                           |
| ABAYE3615 | 3654320 | 3652779 | TnAbaR1_49 | + | E | ORF513 transposase                                             |
| ABAYE3614 | 3652397 | 3651834 | TnAbaR1_50 | + | E | DfrA10 dihydrofolate reductase type A10                        |
| ABAYE3613 | 3651797 | 3651450 | TnAbaR1_51 | + | E | QacEdelta1                                                     |
| ABAYE3612 | 3651543 | 3650617 | TnAbaR1_52 | + | E | Sul1 dihydropteroate synthase type-1                           |
| ABAYE3611 | 3650489 | 3659989 | TnAbaR1_53 | + | E | GCN5-like N-acetyltransferase                                  |
| 1_213     | 3649518 | 3648718 | TnAbaR1_54 | + | G | TnpA transposase for insertion sequence IS6100                 |
| 1_627     | 3648480 | 3648268 | TnAbaR1_55 | - | G | Urf2Y                                                          |
| ABAYE3607 | 3648202 | 3647966 | TnAbaR1_56 | - | G | MerE mercuric resistance protein                               |
| ABAYE3606 | 3647969 | 3647571 | TnAbaR1_57 | - | G | MerD HTH-type transcriptional regulator                        |
| ABAYE3605 | 3647586 | 3645841 | TnAbaR1_58 | - | G | MerA mercuric ion reductase (Hg(II) reductase)                 |
| ABAYE3604 | 3645862 | 3645437 | TnAbaR1_59 | - | G | MerC mercury resistance inner membrane protein                 |
| 1_612     | 3645409 | 3645134 | TnAbaR1_60 | - | G | MerP mercuric transporter protein, periplasmic binding protein |
| 1_609     | 3645118 | 3644753 | TnAbaR1_61 | - | G | MerT mercuric ion transport protein                            |
| ABAYE3601 | 3644681 | 3644226 | TnAbaR1_62 | + | G | MerR mercury resistance operon regulatory protein              |
| ABAYE3599 | 3644088 | 3643846 | TnAbaR1_63 | + | G | Putative relaxase/helicase                                     |
| ABAYE3598 | 3643814 | 3643137 | TnAbaR1_64 | - | G | TetR tetracycline repressor protein, Class A                   |
| ABAYE3597 | 3643133 | 3641859 | TnAbaR1_65 | + | G | TetA tetracycline resistance protein, Class A                  |
| ABAYE3596 | 3641827 | 3640943 | TnAbaR1_66 | - | G | PecM-like putative membrane protein                            |
| ABAYE3593 | 3640805 | 3640398 | TnAbaR1_67 | - | G | Putative isochorismatase hydrolase                             |
| 1_275     | 3640478 | 3638658 | TnAbaR1_68 | + | G | TnpA transposase Tn1721                                        |
| ABAYE3588 | 3638594 | 3638214 | TnAbaR1_69 | + | G | Putative GCN5-related N-acetyltransferase                      |
| ABAYE3587 | 3638013 | 3637354 | TnAbaR1_70 | - | G | CatA chloramphenicol acetyltransferase                         |
| 1_285     | 3637075 | 3636800 | TnAbaR1_71 | + | G | InsA IS1 transposase                                           |
| 1_287     | 3636881 | 3636363 | TnAbaR1_72 | + | G | InsB IS1 transposase                                           |
| ABAYE3584 | 3636366 | 3633817 | TnAbaR1_73 | - | G | Transposase of Tn1                                             |

|                |         |         |            |   |   |                                                   |
|----------------|---------|---------|------------|---|---|---------------------------------------------------|
| ABAYE3583      | 3633566 | 3632844 | TnAbaR1_74 | - | I | TnpA transposase of IS26, IS6 family              |
| ABAYE3582      | 3632885 | 3629949 | TnAbaR1_75 | + | I | Transposase                                       |
| ABAYE3581      | 3629838 | 3629179 | TnAbaR1_76 | + | I | TnpR resolvase                                    |
| ABAYE3580      | 3629179 | 3628463 | TnAbaR1_77 | + | I | Transposase of IS15DI, IS6 family                 |
| ABAYE3578      | 3627863 | 3627048 | TnAbaR1_78 | - | I | AphA1 aminoglycoside 3'-phosphotransferase        |
| ABAYE3576      | 3626801 | 3626614 | TnAbaR1_79 | + | I | TnpA transposase of IS26, IS6 family              |
| 1_516          | 3625452 | 3626066 | TnAbaR1_80 | - | I | TnpM transposase                                  |
| ABAYE3575      | 3625513 | 3624500 | TnAbaR1_81 | - | I | Int integrase/recombinase                         |
| ABAYE3574      | 3624570 | 3624352 | TnAbaR1_82 | + | I | Truncated Sat, streptothricin acetyl-transferase  |
| ABAYE3573      | 3624398 | 3623865 | TnAbaR1_83 | + | I | AacC1 gentamicin 3'-acetyltransferase             |
| ABAYE3572      | 3623767 | 3623234 | TnAbaR1_84 | + | I | OrfX putative GCN5-related N-acetyltransferase    |
| ABAYE3571      | 3623208 | 3622696 | TnAbaR1_85 | + | I | OrfX putative GCN5-related N-acetyltransferase    |
| 1_344          | 3622680 | 3622375 | TnAbaR1_86 | + | I | Hypothetical protein                              |
| ABAYE3570      | 3622283 | 3621492 | TnAbaR1_87 | + | I | AadA1 aminoglycoside 3'-(9)-O-adenylyltransferase |
| ABAYE3569      | 3621328 | 3620981 | TnAbaR1_88 | + | I | QacEdelta1                                        |
| ABAYE3568      | 3621074 | 3620148 | TnAbaR1_89 | + | I | Sul1 dihydropteroate synthase type-1              |
| 1_360          | 3620020 | 3619520 | TnAbaR1_90 | + | I | Orf5                                              |
| New annotation | 3619496 | 3619209 | TnAbaR1_91 | + | I | Hypothetical protein                              |
| 1_365          | 3618853 | 3618368 | TnAbaR1_92 | + | I | Resolvase N-term                                  |
| 1_366          | 3618614 | 3618225 | TnAbaR1_93 | + | I | Resolvase C-term                                  |
| ABAYE3562      | 3617997 | 3617779 | TnAbaR1_94 | + | I | Hypothetical protein                              |
| ABAYE3561      | 3617722 | 3617459 | TnAbaR1_95 | - | I | TrbI fragment of conjugal transfer protein        |
| ABAYE3560      | 3617337 | 3616915 | TnAbaR1_96 | - | J | CadR transcriptional regulator, MerR family       |
| ABAYE3559      | 3616834 | 3615938 | TnAbaR1_97 | + | J | CadA heavy metal transport/detoxification protein |
| ABAYE3558      | 3615934 | 3615422 | TnAbaR1_98 | + | J | IspA prolipoprotein signal peptidase (SPase II)   |
| ABAYE3556      | 3615400 | 3614111 | TnAbaR1_99 | + | J | Transposase                                       |

|                                         |         |         |             |   |     |                                                           |
|-----------------------------------------|---------|---------|-------------|---|-----|-----------------------------------------------------------|
| ABAYE3554                               | 3613725 | 3614050 | TnAbaR1_100 | - | K   | Truncated N-terminal end of UspA universal stress protein |
| ABAYE3553                               | 3614075 | 3612223 | TnAbaR1_101 | - | K   | <a href="#">Sup sulphate transporter, MFS superfamily</a> |
| ABAYE3552                               | 3613710 | 3610132 | TnAbaR1_102 | - | K   | Orf4 hypothetical protein                                 |
| ABAYE3551                               | 3611928 | 3609192 | N/A         | - | N/A | N-terminal ComM, Mg <sup>2+</sup> chelatase               |
| <b>Total number of genes</b>            | 102     |         |             |   |     |                                                           |
| <b>Total number of resistance genes</b> | 48      |         |             |   |     |                                                           |

<sup>a</sup> Putative resistance genes are highlighted in blue. Changes or additions to original annotations are highlight in red.



**Table S5: Protein coding sequence identified in TnAbaR23<sup>a</sup>**

| Locus_tag in TnAbaR23 | Coordinates |       | Orientation | Module | Homolog in TnAbaR1 or other <i>A. baumannii</i> genome       | Matching locus tag in TnAbaR1/ other genomes | % identity <sup>b</sup> |
|-----------------------|-------------|-------|-------------|--------|--------------------------------------------------------------|----------------------------------------------|-------------------------|
|                       | start       | end   |             |        |                                                              |                                              |                         |
| N/A                   | 2931        | 2248  | -           | N/A    | C-terminal ComM, Mg <sup>2+</sup> chelatase                  | N/A                                          | 100                     |
| TnAbaR23_01           | 3008        | 3765  | +           | A      | TniA transposition protein A                                 | TnAbaR1_01                                   | 100                     |
| TnAbaR23_02           | 3767        | 5677  | +           | A      | TniB transposition protein B                                 | TnAbaR1_02                                   | 100                     |
| TnAbaR23_03           | 5682        | 6602  | +           | A      | TniC transposition helper protein C                          | TnAbaR1_03                                   | 100                     |
| TnAbaR23_04           | 6632        | 7747  | +           | A      | Orf 2 hypothetical protein                                   | TnAbaR1_04                                   | 100                     |
| TnAbaR23_05           | 7725        | 9188  | +           | A      | Orf 3 hypothetical protein                                   | TnAbaR1_05                                   | 100                     |
| TnAbaR23_06           | 10386       | 9292  | -           | A      | TrkA putative monooxygenase                                  | TnAbaR1_06                                   | 100                     |
| TnAbaR23_07           | 11318       | 10461 | -           | B      | TrxB thioredoxin reductase                                   | TnAbaR1_07                                   | 100                     |
| TnAbaR23_08           | 12136       | 11432 | -           | B      | <a href="#">ArsH arsenic resistance protein</a>              | <a href="#">TnAbaR1_08</a>                   | 100                     |
| TnAbaR23_09           | 13185       | 12142 | -           | C      | <a href="#">ArsB transmembrane protein of arsenate pump</a>  | <a href="#">TnAbaR1_09</a>                   | 100                     |
| TnAbaR23_10           | 13666       | 13193 | -           | C      | <a href="#">ArsC arsenate reductase</a>                      | <a href="#">TnAbaR1_10</a>                   | 100                     |
| TnAbaR23_11           | 14005       | 13673 | -           | C      | <a href="#">ArsR arsenite inducible repressor</a>            | <a href="#">TnAbaR1_11</a>                   | 100                     |
| TnAbaR23_12           | 14551       | 14051 | -           | C      | <a href="#">ArsC arsenate reductase</a>                      | <a href="#">TnAbaR1_12</a>                   | 100                     |
| TnAbaR23_13           | 15215       | 14688 | -           | C      | Truncated N-terminal end of UspA universal stress protein    | TnAbaR1_13                                   | 100                     |
| TnAbaR23_14           | 15730       | 15309 | -           | D      | <a href="#">Cad R transcriptional regulator, MerR family</a> | <a href="#">TnAbaR1_14</a>                   | 100                     |
| TnAbaR23_15           | 16707       | 15811 | +           | D      | <a href="#">Cad A heavy metal detoxification protein</a>     | <a href="#">TnAbaR1_15</a>                   | 100                     |
| TnAbaR23_16           | 17223       | 15811 | +           | D      | LspA lipoprotein signal peptide                              | TnAbaR1_16                                   | 99                      |
| TnAbaR23_17           | 17223       | 15811 | +           | D      | Transposase IS204/IS1001/IS1096/IS1165 family                | TnAbaR1_17                                   | 100                     |
| TnAbaR23_18           | 19120       | 18687 | -           | F      | Truncated hypothetical protein                               | AB57_0261                                    | 99                      |
| TnAbaR23_19           | 19342       | 21360 | +           | F      | TopA DNA topoisomerase I                                     | AB57_0262                                    | 100                     |
| TnAbaR23_20           | 21387       | 21740 | +           | F      | Ssb protein                                                  | AbauAB059_010100015377                       | 100                     |
| TnAbaR23_21           | 21768       | 22100 | +           | F      | Hypothetical protein                                         | AbauAB0_10281                                | 100                     |
| TnAbaR23_22           | 22863       | 22432 | -           | F      | Hypothetical protein                                         | AB57_0264                                    | 100                     |

|             |       |       |   |   |                                                                |            |     |
|-------------|-------|-------|---|---|----------------------------------------------------------------|------------|-----|
| TnAbaR23_23 | 22971 | 23912 | + | F | Sul1 dihydropteroate synthase                                  | AB57_0265  | 100 |
| TnAbaR23_24 | 24040 | 24540 | + | F | Orf 5 acetyltransferase, GNAT family                           | AB57_0266  | 100 |
| TnAbaR23_25 | 25011 | 25811 | + | G | TnpA transposase for insertion sequence IS6100                 | TnAbaR1_54 | 100 |
| TnAbaR23_26 | 26261 | 26049 | - | G | Urf2Y                                                          | TnAbaR1_55 | 100 |
| TnAbaR23_27 | 26563 | 26327 | - | G | MerE mercuric resistance protein                               | TnAbaR1_56 | 100 |
| TnAbaR23_28 | 26946 | 26563 | - | G | MerD HTH-type transcriptional regulator                        | TnAbaR1_57 | 100 |
| TnAbaR23_29 | 28628 | 26943 | - | G | MerA mercuric ion reductase (Hg(II) reductase)                 | TnAbaR1_58 | 100 |
| TnAbaR23_30 | 29092 | 28667 | - | G | MerC mercury resistance inner membrane protein                 | TnAbaR1_59 | 100 |
| TnAbaR23_31 | 29395 | 29122 | - | G | MerP mercuric transporter protein, periplasmic binding protein | TnAbaR1_60 | 100 |
| TnAbaR23_32 | 29776 | 29411 | - | G | MerT mercuric ion transport protein                            | TnAbaR1_61 | 100 |
| TnAbaR23_33 | 29848 | 30303 | + | G | MerR mercury resistance operon regulatory protein              | TnAbaR1_62 | 100 |
| TnAbaR23_34 | 30441 | 30683 | + | G | Putative relaxase/helicase                                     | TnAbaR1_63 | 100 |
| TnAbaR23_35 | 31392 | 30715 | - | G | TetR tetracycline repressor protein, Class A                   | TnAbaR1_64 | 100 |
| TnAbaR23_36 | 31396 | 32670 | + | G | TetA tetracycline resistance protein, Class A                  | TnAbaR1_65 | 100 |
| TnAbaR23_37 | 33586 | 32702 | - | G | PecM-like putative membrane protein                            | TnAbaR1_66 | 100 |
| TnAbaR23_38 | 34131 | 33724 | - | G | Putative isochorismatase hydrolase                             | TnAbaR1_67 | 100 |
| TnAbaR23_39 | 34075 | 35871 | + | G | TnpA transposase Tn1721                                        | TnAbaR1_68 | 100 |
| TnAbaR23_40 | 35935 | 36315 | + | G | Putative GCN5-related N-acetyltransferase                      | TnAbaR1_69 | 100 |
| TnAbaR23_41 | 36716 | 36641 | - | G | CatA chloramphenicol acetyltransferase                         | TnAbaR1_70 | 100 |
| TnAbaR23_42 | 37234 | 36623 | - | I | Transposase of IS15DI, IS6 family                              | TnAbaR1_77 | 98  |
| TnAbaR23_43 | 37466 | 37951 | + | I | Truncated AacC1 gentamicin 3'-acetyltransferase                | TnAbaR1_83 | 99  |
| TnAbaR23_44 | 38070 | 38582 | + | I | OrfX putative GCN5-related N-acetyltransferase                 | TnAbaR1_85 | 100 |
| TnAbaR23_45 | 38598 | 38903 | + | I | Hypothetical protein                                           | TnAbaR1_86 | 100 |
| TnAbaR23_46 | 38995 | 39786 | + | I | AadA1 aminoglycoside 3'-(9)-O-adenylyltransferase              | TnAbaR1_87 | 100 |
| TnAbaR23_47 | 39950 | 40297 | + | I | QacEdelta1                                                     | TnAbaR1_88 | 100 |
| TnAbaR23_48 | 40204 | 41130 | + | I | Sul1 dihydropteroate synthase type-1                           | TnAbaR1_89 | 100 |

|                                         |       |       |   |     |                                                                   |                            |     |
|-----------------------------------------|-------|-------|---|-----|-------------------------------------------------------------------|----------------------------|-----|
| TnAbaR23_49                             | 41258 | 41758 | + | I   | Orf5                                                              | TnAbaR1_90                 | 99  |
| TnAbaR23_50                             | 41782 | 42069 | + | I   | Hypothetical protein                                              | TnAbaR1_91                 | 100 |
| TnAbaR23_51                             | 42425 | 42910 | + | I   | Resolvase N-term                                                  | TnAbaR1_92                 | 100 |
| TnAbaR23_52                             | 42664 | 43053 | + | I   | Resolvase C-term                                                  | TnAbaR1_93                 | 100 |
| TnAbaR23_53                             | 43281 | 43499 | - | I   | Hypothetical protein                                              | TnAbaR1_94                 | 100 |
| TnAbaR23_54                             | 43819 | 43556 | - | I   | Trbl fragment of conjugal transfer protein                        | TnAbaR1_95                 | 100 |
| TnAbaR23_55                             | 44363 | 43941 | - | J   | <a href="#">CadR transcriptional regulator, MerR family</a>       | <a href="#">TnAbaR1_96</a> | 100 |
| TnAbaR23_56                             | 44444 | 45340 | + | J   | <a href="#">CadA heavy metal transport/detoxification protein</a> | <a href="#">TnAbaR1_97</a> | 100 |
| TnAbaR23_57                             | 45344 | 45856 | + | J   | IspA prolipoprotein signal peptidase (SPase II)                   | TnAbaR1_98                 | 100 |
| TnAbaR23_58                             | 45878 | 47167 | + | J   | Transposase                                                       | TnAbaR1_99                 | 100 |
| TnAbaR23_59                             | 47553 | 47226 | - | K   | Truncated N-terminal end of UspA universal stress protein         | TnAbaR1_100                | 100 |
| TnAbaR23_60                             | 49055 | 47568 | - | K   | <a href="#">Sup sulphate transporter, MFS superfamily</a>         | TnAbaR1_101                | 100 |
| TnAbaR23_61                             | 51146 | 49350 | - | K   | Orf4 hypothetical protein                                         | TnAbaR1_102                | 100 |
| N/A                                     | 52086 | 51229 | - | N/A | N-terminal ComM, Mg <sup>2+</sup> chelatase                       | N/A                        |     |
| <b>Total number of genes</b>            | 61    |       |   |     |                                                                   |                            |     |
| <b>Total number of resistance genes</b> | 27    |       |   |     |                                                                   |                            |     |

<sup>a</sup> Putative resistance genes are highlighted in blue. Changes or additions to original annotations are highlight in red.

<sup>b</sup> Percentage identity between the predicted amino acid sequences of *TnAbaR23* gene and its matching locus.

**Table S6. Annotation details of non-TnAbaR1 modules identified to date within the TnAbaR family of transposons <sup>a</sup>**

| Locus_tag      | Coordinates |        | Orientation | Module | Description                                              |
|----------------|-------------|--------|-------------|--------|----------------------------------------------------------|
|                | start       | end    |             |        |                                                          |
| AB57_0261      | 279360      | 279794 | -           | F      | Hypothetical protein                                     |
| AB57_0262      | 280016      | 282034 | +           | F      | TopA DNA topoisomerase I                                 |
| AB57_0263      | 282061      | 282414 | +           | F      | Ssb protein                                              |
| New annotation | 282442      | 282774 | +           | F      | Hypothetical protein                                     |
| AB57_0264      | 283106      | 283537 | -           | F      | Hypothetical protein                                     |
| AB57_0265      | 283659      | 284585 | +           | F      | Sul1 dihydropteroate synthase                            |
| AB57_0266      | 284713      | 285231 | +           | F      | Orf 5 acetyltransferase, GNAT family                     |
| AB57_0281      | 298836      | 301841 | -           | H      | TnpA Transposase Tn3                                     |
| AB57_0282      | 302004      | 302561 | +           | H      | TnpR Transposon Tn3 resolvase                            |
| AB57_0283      | 302744      | 303604 | +           | H      | Bla(TEM) $\beta$ -lactamase                              |
| AB57_0549      | 584648      | 585082 | -           | L      | Transposase                                              |
| AB57_0550      | 585156      | 585738 | -           | L      | Transposase 1                                            |
| AB57_0551      | 585844      | 586665 | +           | L      | Bla(OXA-23) $\beta$ -lactamase                           |
| AB57_0552      | 586770      | 587078 | -           | L      | AAA ATPase superfamily protein                           |
| AB57_0553      | 587330      | 587884 | -           | L      | Hypothetical protein                                     |
| AB57_0554      | 587892      | 588224 | -           | L      | YeeA Type II restriction enzyme                          |
| AB57_0555      | 588326      | 588895 | +           | L      | Transposase 1                                            |
| AB57_0556      | 588982      | 589416 | +           | L      | Transposase subunit                                      |
| ACICU_00223    | 250782      | 251414 | +           | M      | Aac(6)-1b Aminoglycoside 6'-N-acetyl transferase type Ib |
| ACICU_00225    | 251553      | 251876 | +           | M      | Hypothetical protein                                     |
| ACICU_00226    | 251962      | 252762 | +           | M      | bla(OXA-20) $\beta$ -lactamase                           |
| A1S_0208       | 230959      | 231921 | -           | N      | IsAba11                                                  |
| AB57_0558      | 590899      | 591747 | -           | O      | Universal stress protein                                 |
| AB57_0559      | 592187      | 592558 | -           | O      | Hypothetical protein                                     |
| AB57_0560      | 592667      | 592786 | -           | O      | UspA                                                     |

<sup>a</sup> Putative resistance genes are highlighted in blue. Changes or additions to original annotations are highlight in red.

## Supplementary References

- S1. **Adams-Haduch, J. M., D. L. Paterson, H. E. Sidjabat, A. W. Pasculle, B. A. Potoski, C. A. Muto, L. H. Harrison, and Y. Doi.** 2008. Genetic basis of multidrug resistance in *Acinetobacter baumannii* clinical isolates at a tertiary medical center in Pennsylvania. *Antimicrob. Agents Chemother.* **52**:3837-3843. doi: 10.1128/AAC.00570-08.
- S2. **Choi, K. H., and H. P. Schweizer.** 2005. An improved method for rapid generation of unmarked *Pseudomonas aeruginosa* deletion mutants. *BMC Microbiol.* **5**:30. doi: 10.1186/1471-2180-5-30.
- S3. **Higgins, P. G., M. Lehmann, and H. Seifert.** 2010. Inclusion of OXA-143 primers in a multiplex polymerase chain reaction (PCR) for genes encoding prevalent OXA carbapenemases in *Acinetobacter* spp. *Int. J. Antimicrob. Agents.* **35**:305. doi: 10.1016/j.ijantimicag.2009.10.014.
- S4. **Koeleman, J. G., J. Stoof, M. W. Van Der Bijl, C. M. Vandenbroucke-Grauls, and P. H. Savelkoul.** 2001. Identification of epidemic strains of *Acinetobacter baumannii* by integrase gene PCR. *J. Clin. Microbiol.* **39**:8-13. doi: 10.1128/JCM.39.1.8-13.2001.
- S5. **Kusradze, I., S. M. Diene, M. Goderdzishvili, and J. M. Rolain.** 2011. Molecular detection of OXA carbapenemase genes in multidrug-resistant *Acinetobacter baumannii* isolates from Iraq and Georgia. *Int. J. Antimicrob. Agents.* **38**:164-168. doi: 10.1016/j.ijantimicag.2011.03.021.
- S6. **Mendes, R. E., K. A. Kiyota, J. Monteiro, M. Castanheira, S. S. Andrade, A. C. Gales, A. C. Pignatari, and S. Tufik.** 2007. Rapid detection and identification of metallo- $\beta$ -lactamase-encoding genes by multiplex real-time PCR assay and melt curve analysis. *J. Clin. Microbiol.* **45**:544-547. doi: 10.1128/JCM.01728-06.
- S7. **Nagano, N., Y. Nagano, C. Cordevant, N. Shibata, and Y. Arakawa.** 2004. Nosocomial transmission of CTX-M-2  $\beta$ -lactamase-producing *Acinetobacter baumannii* in a neurosurgery ward. *J. Clin. Microbiol.* **42**:3978-3984. doi: 10.1128/JCM.42.9.3978-3984.2004.
- S8. **Ng, L. K., I. Martin, M. Alfa, and M. Mulvey.** 2001. Multiplex PCR for the detection of tetracycline resistant genes. *Mol. Cell. Probes.* **15**:209-215. doi: 10.1006/mcpr.2001.0363.
- S9. **Nigro, S. J., V. Post, and R. M. Hall.** 2011. Aminoglycoside resistance in multiply antibiotic-resistant *Acinetobacter baumannii* belonging to global clone 2 from Australian hospitals. *J. Antimicrob. Chemother.* **66**:1504-1509. doi: 10.1093/jac/dkr163.

- S10. **Novais, A., R. Cantón, A. Valverde, E. Machado, J. C. Galán, L. Peixe, A. Carattoli, F. Baquero, and T. M. Coque.** 2006. Dissemination and persistence of *bla*<sub>CTX-M-9</sub> are linked to class 1 integrons containing CR1 associated with defective transposon derivatives from Tn402 located in early antibiotic resistance plasmids of IncHI2, IncP1-alpha, and IncFI groups. *Antimicrob. Agents Chemother.* **50**:2741-2750. doi: 10.1128/AAC.00274-06.
- S11. **Post, V., and R. M. Hall.** 2009. AbaR5, a large multiple-antibiotic resistance region found in *Acinetobacter baumannii*. *Antimicrob. Agents Chemother.* **53**:2667-2671. doi: 10.1128/AAC.01407-08.
- S12. **Shaikh, F., R. P. Spence, K. Levi, H. Y. Ou, Z. Deng, K. J. Towner, and K. Rajakumar.** 2009. ATPase genes of diverse multidrug-resistant *Acinetobacter baumannii* isolates frequently harbour integrated DNA. *J. Antimicrob. Chemother.* **63**:260-264. doi: 10.1093/jac/dkn481.
- S13. **Vila, J., J. Ruiz, P. Goñi, and T. Jimenez de Anta.** 1997. Quinolone-resistance mutations in the topoisomerase IV *parC* gene of *Acinetobacter baumannii*. *J. Antimicrob. Chemother.* **39**:757-762.
- S14. **Vila, J., J. Ruiz, P. Goñi, A. Marcos, and T. Jimenez de Anta.** 1995. Mutation in the *gyrA* gene of quinolone-resistant clinical isolates of *Acinetobacter baumannii*. *Antimicrob. Agents Chemother.* **39**:1201-1203.
- S15. **Woodford, N., M. J. Ellington, J. M. Coelho, J. F. Turton, M. E. Ward, S. Brown, S. G. Amyes, and D. M. Livermore.** 2006. Multiplex PCR for genes encoding prevalent OXA carbapenemases in *Acinetobacter* spp. *Int. J. Antimicrob. Agents.* **27**:351-353. doi: 10.1016/j.ijantimicag.2006.01.004.
